# Supplementary material for: Increased processing of SINE B2 ncRNAs unveils a novel type of transcriptome deregulation in amyloid beta neuropathology
Source: eLife. 2020 Nov 16;9:e61265. doi: 10.7554/eLife.61265 (PMC7717908; doi:10.7554/eLife.61265)
Supplement: Supplementary file 1. — Supplementary Table 1. List of B2 RNA regulated SRGs(B2-SRGs). Data are compiled from Zovoilis et al., 2016 and include those genes that are close to B2 CHART peaks (genome-binding sites) before but not after the application of stress stimulus. Supplementary Table 2. Complete lists of enriched terms in B2 RNA regulated SRGs(B2-SRGs)(see Suppl.Table 1) for Tissue Enrichemnt (left), Biological Process (middle) and Cellular Compartment (right). Supplementary Table 3. List of B2 RNA regulated SRGs (B2-SRGs) (see Suppl.Table 1) that are associated with learning based on Peleg et al., 2010. Supplementary Table 4. Upregulated genes in hippocampi of APP 6-month-old mice compared to 6-month WT mice. Values were calculated using DESeq (see Materials and methods) on long-RNA-seq data. Only genes with an FDR < 0.2 are depicted. Supplementary Table 5. List of B2 RNA regulated SRGs (B2-SRGs) (see Suppl.Table 1) that are upregulated in 6-month-old APP mice compared to WT (see Suppl.Table 4) Supplementary Table 6. List of B2 RNA regulated SRGs (B2-SRGs) (see Suppl.Table 1) that are upregulated in 6-month-old APP mice (see Suppl.Table 4) and are associated with learning based on Peleg et al., 2010. Supplementary Table 7. Complete lists of enriched terms in B2 RNA regulated SRGs (B2-SRGs) that are upregulated in 6-month-old APP mice compared to WT (see Suppl.Table 5) for Biological Process (left) and Cellular Compartment (right). Supplementary Table 8. Upregulated genes in HT22 cells treated with amyloid beta and Scr LNA compared to cells treated with the control peptide and scr LNA. Values were calculated using DESeq (see Materials and methods) on long-RNA-seq data. Only genes with an FDR < 0.2 are depicted. Supplementary Table 9. List of genes that are upregulated in HT22 cells treated with amyloid beta (see Suppl.Table 8) and in 6-month-old APP mice (see Suppl.Table 4) Supplementary Table 10. List of B2 RNA regulated SRGs (B2-SRGs) (see Suppl.Table 1) that are upregulated in HT22 [file elife-61265-supp1.xlsx]

## Sheet: Suppl. Table 13
Supplementary Table 13:	List of non B2 RNA regulated genes (random set) used throughout the study.
Gene Name
Gm13293
Cfap45
Nek8
Gm24273
Gm44616
Tmem53
Gm4767
Gm24306
Gm37777
9330159M07Rik
Zfp114
Gm25926
Gm49396
Gm18368
Gm38257
Gm4824
Gm6612
9430031K09Rik
Snord73a
Vgll3
AC129214.1
Gm47488
Gm38192
Art3
Gm21972
Osr1
Gm9575
Gm48655
Gm37686
Dnah7b
Gm37848
Gm23570
Abhd11os
Mir5129
Gm10800
Rpl7a-ps7
Sfmbt2
Gm29163
Gm17096
Gm22446
Fermt3
Gm37689
Tmem204
Rbbp8
Rapgef4os1
Gm22510
Gm23676
Gm14425
Nat8f5
4930512B01Rik
Gm22887
Arhgap20os
Gm42984
Kbtbd6
Mir599
4930532I03Rik
Gm26347
Mir335
Nat8f3
4732416N19Rik
Kcnrg
Gm44899
Gm43504
Gm43654
Ppp1r13l
Alkbh2
Gm37367
4921511C10Rik
Gm23940
Exosc6
Gm48542
Gm24878
Gm36963
Gm29155
Gm6781
Gm48726
Gm16894
Gm36638
Gm43875
Gm45094
Atp6ap1l
A330040F15Rik
Gm7979
Gm44895
Dynlt1f
Gm25146
B230110C06Rik
Gm42851
Ccdc173
Gm22105
Ebpl
C130073E24Rik
Gm43844
Zfp568
Gm6296
Zfp335os
Gm13226
Gm6013
Nadsyn1
Spidr
Gm47765
Col9a2
Gm23575
Havcr2
Gm43330
Gm43658
Gm24876
2900072N19Rik
Gm31282
Gm9917
Gm7049
Gm7908
Gm28424
Gm44746
Gm44093
Gm6169
Gm31172
Nek10
Gm21814
1700001K19Rik
Gm43519
Gm41041
Irgm2
Parp9
Gm7701
Gm37578
Relb
Gm7985
Gm9719
Mir343
Tuft1
Gm24451
Card9
4931403G20Rik
Ly6g6e
4921531C22Rik
Gm38228
D630036H23Rik
Zgrf1
Gm15265
Gm26011
Gm43113
Gm8337
Gm17194
Gm48743
Gm43162
Gm48181
Bdh2
Gm11750
Itih2
Gm44234
Gm43696
P2rx6
Snord100
Ovgp1
Gpr150
Zfp879
Thbs1
Gm37677
Klk6
Hist1h2an
Gpr4
Gm38048
Clic3
Rapgef4os2
Gm43084
Impa2
Il6ra
BC025920
Zfp229
Gm37879
Gm28229
Gm43133
Gm25294
Gm13709
Gm45804
A930035D04Rik
Cand2
Gm48006
Mir708
Gm48593
Gm43260
Gm7665
Gm10645
Gm27415
Tfcp2l1
Zscan30
Gm20548
Gm9812
Gm44664
Gm3544
Gm10540
Gm42763
Syde2
1810010H24Rik
Gm42549
Gm38147
Ccdc62
Gm5850
Serpinb1b
Trmo
Gm3510
Gm43457
Gm27313
Bmp4
A730056A06Rik
Gm16297
AC122487.1
Gm27588
Lsr
1700101I11Rik
Cmklr1
Tmem173
Rnf135
AI429214
Gm8899
2810403D21Rik
Vstm4
Gm25364
Gm26499
Gm11417
Gm24610
Runx2os2
Gm38910
D930015M05Rik
Gm37725
Gm37470
Gm43808
Gm6054
A330049N07Rik
Gm11944
Gm16006
Gm15535
Gm43379
Gm25578
Gm49397
Gm20387
Gm36527
Gm10863
1700018L02Rik
Gm15719
2900005J15Rik
Gm25600
Gm45709
Prc1
Espn
Gm15726
Dnah5
Gm44836
Gm46367
Gm24620
Gm3160
Gm23310
Gm18791
D330050G23Rik
Gm42462
Gm42509
Gm26674
6030443J06Rik
Snord35b
A530083M17Rik
Gm37018
Prokr2
AF357399
2510046G10Rik
Gm18422
Meig1
Snora41
4930500M09Rik
Gm6654
Hkdc1
Gm14285
Gm29626
9330188P03Rik
Gm48291
Atp2a3
1700029J07Rik
Gm20633
Gm25761
Gm5511
AC129203.3
Gm5093
Gm18212
Smco4
Gm29156
Gm25128
Gm9780
E530001F21Rik
Gm37397
Gm25813
Gm38036
1600002K03Rik
Stox1
Gm24143
Gm19187
Gm5415
Gm13328
Myadml2
Gm37633
1110025M09Rik
Gm17102
Gm43061
Gm42659
Gm26049
Gm37246
Gm42578
Gm37653
Gm44453
Tfpi
Gm22454
Gm16254
2610035F20Rik
AW822252
9130023H24Rik
Gm23094
Angpt2
Glipr2
Gm17655
A230083G16Rik
Gm43826
2700099C18Rik
Crh
Cmtm7
Ccdc160
Grem1
Gbp3
4933431G14Rik
Zmiz1os1
Gm45767
Gm2735
Ifih1
Gm22973
Gm37553
Fam228a
Mir6951
Gm43145
Gm22391
Gm6109
Gm41115
Sp9
Gm15285
Gm42576
Gm42611
Gm47026
F830112A20Rik
Gm5535
Spata1
Gm12216
Gm42693
Fcgr1
Gm48452
Hist1h2ac
Gm14372
Il4ra
Gm26683
4930415C11Rik
Fbxo47
Gm23200
Gm47797
Timeless
Gm24411
Nipal4
Gm42739
Mir6915
Gm12362
1700020D05Rik
Xylb
Gm37621
Hspg2
Gm44503
Gm29808
Snord50b
Mtag2
Gm22897
4930539E08Rik
Terc
Gm16279
Slc22a6
Gsdmd
AC087898.4
4930517G19Rik
Zfp853
Degs2
Megf6
Gm42588
Gm15868
AC121560.1
Higd1b
Cfap206
Gm49283
Mboat1
Gm26901
Gm24794
Foxc1
Gm24091
D430013B06Rik
C130083M11Rik
Cideb
1700013F07Rik
Gm26711
AC131339.2
Gm47664
1300014J16Rik
Gm9884
9330161L09Rik
9930017N22Rik
Gm8930
Gm49525
Lpar4
Gm43665
Gm45769
Gm13961
Gm47370
Pitpnm2os2
Zfp808
Gm26736
Gm10778
4933433G19Rik
Gm6588
Gm8034
Gm2178
Gm16353
Gm10059
Pcdhb21
Mir3100
Gm43012
Gm17112
Dnph1
Gm44607
Gm38043
Gm30934
6330549D23Rik
2700033N17Rik
A430106G13Rik
Gm35405
Kcnu1
Gm14794
Gm47132
-
Gm11405
Gm22558
4930596I21Rik
Gm5630
Gpr18
Mcub
Gm45635
Kank4
Gm26983
4930404I05Rik
Gm7645
Gm15583
4831440E17Rik
Gm12926
Mir6402
Gm15956
Gm9670
Dnah2
4930525G20Rik
9630009A06Rik
Gm43331
Gm25301
Gm26814
Gm4707
Sertad3
Fank1
Itga1
1700040D17Rik
Gm43071
Gm47246
A930003O13Rik
Dnah6
Gm13767
Gm22579
6430710M23Rik
Gm13171
Gm23209
Rcsd1
Depdc7
Mir6906
Gm25363
Nat1
Gm45084
Nhs
Gm17377
Mir103-2
1700047K16Rik
Gm22073
Gm45846
Gm13830
Gm6212
Gm42864
Mir3080
-
Gm37918
Gm24776
D430036J16Rik
C730002L08Rik
Dnali1
Gm13525
1700007J10Rik
Snord66
Nr6a1os
Gm23356
Gm44668
4933440N22Rik
Gm42595
Hmgb1-ps6
Gm37953
Gm38365
Gm48091
Gm14774
Gm45479
Tnnc1
Gm26767
Mir350
Prg4
Cpeb1os1
Cnn2
Gm3200
Gm44220
Gm12404
Zbtb8b
Gm12774
Npl
2810442N19Rik
Gm37769
Plscr2
Gm49437
Gm43437
Fign
Plac9b
Gm24786
Muc3a
Gm5822
Rpp40
Hyal1
Gins3
Gm6123
Pifo
Mir7027
Ifi203
Klc3
Plcg2
Gm43787
Gm24732
Gm15328
Derl3
Tbc1d2
A230103J11Rik
Zfp202
Gpr25
Lcp2
Gm27711
Gm26334
Gm47870
Gm24530
9430021M05Rik
Gm20149
Gm43000
4633401B06Rik
Gm15398
Isg15
Gm47827
1600029O15Rik
Tex52
Gm38562
Gna15
F8
Gm36638
Gm47504
Dnase1l2
Gm45508
Gm24457
Gm25710
Gm17045
Rgl3
Polq
Gm37069
Gm5851
Gm15702
Gm37138
Gm24923
Hmgb1-ps4
Gm48701
Gm23344
Gm14769
Emid1
Gm16200
Gm13556
Mir5623
Gm9806
Gm47580
Gbp2
Gm9989
Gm47286
Rps6-ps1
Gm47726
Gm37159
Gm13604
Gm7380
Gm17193
Ttc21a
Gm22320
Gm12470
Gm43560
Gm28530
3222401L13Rik
Gm11870
Gm15743
Hist1h2aj
Gm37979
4931414P19Rik
Shroom1
Mir6374
Ehhadh
Gm49085
Gm17753
Evi2
Mir7663
Gm48357
Gm23736
Mir6907
Angptl1
Gm24379
1700096K18Rik
Gm7192
Gal3st4
Chn1os1
Gm26037
n-R5s201
Gm40466
Rpl34-ps2
Gm44008
Gm9947
Gm25406
Gm44011
Zfp647
Gm37143
Gm25120
Gm15379
Gm10484
Gm43259
Gm5446
Nrg4
Gm43566
2210412B16Rik
A430027C01Rik
Mypopos
4930545L23Rik
Gm45131
Gm37978
Fibin
Gm44249
Gm15046
Nudt15
Gm26798
Gm26618
5430434F05Rik
Gm37292
Gm12272
Gm25017
Gm26265
Gm6994
Scn7a
AC091463.1
Gm45088
Trim65
Clec3b
Gm48194
Gm27582
Gm23851
Zfp607a
Gm23039
Gm12359
Lenep
Gm9723
Gm44550
Ccna2
Gm26762
Gm5086
Fam78a
Gm22720
Pi4k2b
Gm42615
Gm22613
Tha1
Krt12
Fam241a
Gm45493
Gm15414
Spsb4
Gm48129
Trpv6
Mir874
Gm23370
Psmb8
Gm24171
Gm42568
Zfp36
Gm28048
Gm44721
Gm48838
Gm6397
Ttc39aos1
Gm25905
Gm27843
Gm9064
Gm43059
Gm48381
Mir1933
Gm45345
Tmc4
Gm42748
Pkmyt1
Slc35f2
Tcf19
Gm15651
A430018G15Rik
Gm37248
Gad1-ps
Gm22042
Gm42969
Loxl1
Gm42727
Gm47572
Gm43178
Gm16243
Gm23202
1810059H22Rik
Gm22449
Gm7808
Zfp217
Gm22121
Gm16364
Gm9752
Gm3325
Cited4
Gm43508
Polr2k-ps
Gm9905
Gm48872
Cldn34c1
Gm16310
Gm22085
Gm2164
Dsc3
Gm37297
Tes
AC116468.1
Apobec4
Gm14212
Gm45645
Gm45165
Gm8318
Gm10723
Gm43256
-
Gm5191
Nme4
Gm36992
4931413K12Rik
Dsn1
Gm27942
Gm16183
Gm9974
Apobec1
Gm18077
Gm26931
Gm42937
Gm42986
Gm22136
Prrg4
Mir369
Gm24918
Gm26854
Gm37738
Gm38057
Tmem266
Gm47284
Pcdha2
Ube4bos1
Gm43807
Gm49309
Gm14376
C2
Gm25517
2410004P03Rik
Gm38359
Mir29a
Gm23999
Rec8
Gm20692
Gm48175
Gm44769
Gm15609
Gm43692
Gm15443
Gm27206
Gm27252
Cyp4f17
Phf2os1
Mir132
Gm12227
Gm10642
Gm45428
Gm26285
AI506816
Gm29083
5430402O13Rik
Gm13392
Mir6769b
Gm24016
Gm11628
Gm13617
Gm46234
Gm45615
Gm37090
Gm17092
Creb3l1
Rnf207
Fyb2
Gm12808
Gm3081
Gm26233
Gm45869
Gm26413
Gm19967
Fbln5
Gm17022
Ldha-ps2
Gm38300
Gm11199
Gm43483
Gm13090
Gem
Gm24866
Gm44643
Gm26594
Gngt2
Gm37651
Gm10766
4930413G21Rik
Gm6533
Gm22255
Zfp78
Gm15853
Nusap1
Slco4c1
Gm45151
Ovol2
B230377A18Rik
Frem2
Gm29325
3110070M22Rik
Gm46436
Cfb
Gm22549
Gm16210
Gm23691
Panct2
Gm45630
Gm24328
Gm37934
Gm13380
Mrto4-ps2
4930563E22Rik
Gm48146
1500002C15Rik
Chmp4c
Gm44144
Gm20537
Slc26a11
8430432A02Rik
Gm17823
Gm38158
3110082J24Rik
Gm3511
Tmem238
Gm26859
Gm19337
Gm17205
Gm3693
1700063D05Rik
Itga9
Gm26621
Gm26789
CT030161.1
Bora
Gm45041
Bambi
Gm38253
9830144P21Rik
Gm21680
Stac
Gm47218
Gm14387
Gm24272
3110009E18Rik
Gm15860
Gm15381
Gm8666
Gm12039
Mir338
Gm26890
Zfp764
n-R5s171
Gm38097
Gm37551
E230020A03Rik
Nes
Gm37132
Sfxn2
Gm12229
Tmem210
Gm18755
Gm26070
Hebp2
Gm25694
Gm43216
Gm27931
Gm26732
Gm48382
Gm7589
Gm15879
Pgf
Gm44022
Gm22948
Gm48552
Gm14335
Gm42930
Gm38169
Gm22506
Neu3
Gm15994
Gm44981
Gm37860
Ifitm1
Gm19280
Gm3355
Gm24399
Flt3l
Gm17893
Gm44040
Gm27301
Gm20475
2900078I11Rik
Gm25474
Gm14382
Uba7
Gpsm3
4933407L21Rik
Gm43112
3110062G12Rik
Gm42878
Gm13642
AA914427
Gm32983
Gm32014
Gm23286
Gm23419
Gm14472
Trim30a
Gm10382
Zic3
Gm45838
Has3
4930408O17Rik
Gm47134
Gm32391
Asb18
A230107N01Rik
Gm47644
Gm2412
Hvcn1
Gm23126
Gm11245
Naaladl2
Cnmd
Nthl1
Gm38340
Gm44439
C2cd4d
Gm30873
1700085D07Rik
Gm22300
2310043M15Rik
Gm25190
4930587E11Rik
Gm38259
Lppos
Gm37052
Gm24671
Gm16740
Gm22063
Gm15601
Gm9003
Gm25871
Gm43201
Nrtn
Wdr66
Gm47882
Gm4651
Gm12737
Adam12
Rasgef1c
Pola2
Gm49545
Gm47234
Gm21009
Gm16539
Gm23483
Gm14411
BC037039
Gm26097
Gm25720
Gm45477
Gm25998
Gm14093
Gm43172
Gm11926
Tceanc
Gm25965
2900035J10Rik
Gm19371
n-R5s15
Gm12788
Gm26721
Gm37466
Map3k8
Gm2065
Gm18329
Gm17056
Sypl2
4930579K19Rik
Gm14966
Gm32647
Sox18
Gm38166
Gm6665
Gm21844
Gm42651
A530046M15Rik
Gm37776
Dtnbos
Gm4432
Gm37962
4931440F15Rik
Ankef1
Gm15991
Emp3
Gm7054
Prkag2os1
Gm37788
Gm45623
Gm12538
Gm48147
Gm45733
Gm18988
Gm13361
Gm5452
Gm23143
Gm17825
Gm37949
Cfap43
Tdrd5
Ctsk
Yy2
Gm4593
Gm22971
Rbx1-ps
Gm47583
AC164314.2
Airn
Gm46448
Gm15029
Gm11096
Mir98
Gm15696
Lnx2
Gm7278
1700110C19Rik
Gng8
Gm26123
A730063M14Rik
Cish
Gm43707
D130020L05Rik
Gm20045
Mir6902
Cmya5
Gm15688
Fam198b
Gm16093
Gm13572
Gm9104
Accs
Hic2
Gm12568
Gm7160
Akna
Gm6611
Rps19-ps2
Gm9891
A730011C13Rik
Gm37023
Cfap161
Gm44897
Gm43817
Gm37509
Gm15775
Six3
9130019O22Rik
6430571L13Rik
Gm43480
2810402E24Rik
Hdc
Dynlt1a
AC170998.1
Abhd15
Gm10075
Gm20713
Gm16892
AC151275.1
Gm45209
Gm48512
Mirlet7a-1
Aox3
Gm34727
Tacr3
Mir124a-2
Lca5l
Pex11g
Gm14052
Gm42483
AC165953.1
Sycp2
Gm48855
F420014N23Rik
D630030B08Rik
Gm37183
H2-M10.2
Gm16179
Gm37212
Xkr8
Gm38285
Akirin1-ps
Gm13880
Gm15744
Prph
Gm47536
Tmem114
5930403N24Rik
Gm45053
Zap70
Tlr13
Gja6
Polg2
Gm37452
Gm38200
Lrrc71
Gm25447
Bcl2a1b
Zfp429
Catip
Gm26628
Gm42507
4833421G17Rik
Gm28307
4930465K09Rik
Cstad
Tdg-ps
Gm37309
Gm44103
Stk36
Zwilch
9930024M15Rik
Gm6963
Gm22396
Gm18940
Pip5kl1
6820408C15Rik
Pou5f2
Gm44075
Gm47700
Rtkn2
2310058D17Rik
Mir185
Cela1
Sdsl
4930455C13Rik
9430065F17Rik
Tifab
Glb1l2
Gm18338
Gm16214
Gm8990
Mir6932
Pemt
Gm37745
Mfap4
A930037H05Rik
Pus7l
Gm22952
Lyl1
Gm25225
Gm20732
4921511I17Rik
Gm26020
Gm7467
Atcayos
Syk
Gm7613
Spint1
Snord11
Tmie
Gm14970
Gm37566
Tnfrsf1b
Gm47911
Gm22540
A830052D11Rik
Gm38115
Gm15806
Gm47121
Gm48349
Gm44891
Gm27017
Gm37980
Gm13562
Pim1
Gm15751
Gm24650
Cenps
AC126254.1
Gm38297
Tgif1
Mir3106
Gm37655
Gm10657
Gm44437
Gm38059
Tacc3
Gm12322
Gm44848
Aoc2
Gm24561
Gm38014
Gm37137
2310030G06Rik
Mir6920
Hist1h2ah
Gm49376
Gm22583
Gm13038
Lbhd2
Gm43466
Gm37115
Gm47597
Gm38134
Gm25559
Gm25235
Wdr46-ps
Adamts8
Gm45137
Thap6
Gpx7
Gm24771
Gm17875
Gm17191
Tap1
Gm7842
Gm44089
Gm16334
1700024B18Rik
Gm22661
Gm25178
Gm46231
Gm37321
Gm45841
Spats1
Gm35339
1810012K08Rik
Akr1c18
Oaz3
Gm45453
Gm29783
Gm27326
Mir6997
Mir8112
Gm9157
Wnt10a
Cdkn2c
Ehd2
Gm47303
4930577N17Rik
Tespa1
Fes
Gm37195
Slc30a2
Gm47086
Gm20445
Rab32
Gm24647
Dnajb3
Gm8960
Ell3
Plekhf1
Gm3527
4930428E07Rik
Kctd14
Gm6473
Gm42492
Gm45464
Gm37792
D330041H03Rik
Gm43237
Gm13140
Gm23862
Gm14174
Gm43011
Rpl22-ps1
Gm16240
Gm42782
Mageb16-ps2
Olfr1564
4921513H07Rik
Gm37105
Gm45797
Gm37255
Gm49201
Gm43967
Gm29257
Gm37720
Gm20186
AC078895.1
Gm10644
Esd-ps
Gm17171
Gm14393
1700126G02Rik
Cchcr1
Gm44280
Gm44982
Gm49003
Gm14200
Gm13586
5930409G06Rik
Slc25a45
Cd86
Gm23656
Snord8
Gm13342
Gm8850
Gm43029
Tubb4b-ps2
Mir1251
Snord35a
Gm17160
Gm22840
C920006O11Rik
1700016K19Rik
Gm25455
Htr2b
Gm27285
Gm24959
Gm45309
Gm15952
Angptl3
Gm37649
Kcnk6
Gm25544
A530058O07Rik
Gm25209
Gm22020
Gm43841
Pcdha1
Wfdc1
9930004E17Rik
Gm8546
Plxna4os1
Gm23184
Gm45867
Gm18782
Gm11659

## Sheet: Suppl.Table 12
Supplementary Table 12:	Correlation co-efficients and p-values for genes of Suppl. Figure 7E. Includes genes for which there was readcoverage across all sample and the correlation p value was less than 0.05.
Total:	659 genes
	r	p-value
Eea1	0.805898	4.48658e-08
Vmn1r28	0.771553	3.75e-07
Lrp1	0.768151	4.53728e-07
Hhat	0.763815	5.75747e-07
Ints1	0.742755	1.71141e-06
Rhoj	0.741644	1.80737e-06
Atad2b	0.732229	2.8398e-06
Gcn1l1	0.731023	3.005e-06
Lrrk2	0.725884	3.81086e-06
Mast4	0.725563	3.86708e-06
Exoc4	0.724584	4.04352e-06
Gstcd	0.722394	4.46486e-06
Evc2	0.721594	4.62839e-06
Myo18a	0.716895	5.70349e-06
Cabin1	0.715326	6.11e-06
Zdhhc6	0.714168	6.42647e-06
Vac14	0.712455	6.922e-06
Zfp959	0.708287	8.27516e-06
Prkd1	0.705706	9.22857e-06
Sufu	0.701868	1.08303e-05
Macf1	0.70093	1.12582e-05
Stx3	0.699857	1.1766e-05
Pacsin2	0.696922	1.3263e-05
Thada	0.695311	1.41558e-05
Brd4	0.694685	1.45172e-05
Myo1d	0.694372	1.4701e-05
Dlg5	0.691028	1.67992e-05
Asb3	0.690784	1.69621e-05
Ror1	0.68944	1.78868e-05
Mocs1	0.689199	1.80576e-05
Pofut2	0.689116	1.81166e-05
Slc16a10	0.688842	1.83125e-05
Matn2	0.685965	2.04913e-05
Thsd7a	0.685278	2.10448e-05
Ttc28	0.68508	2.12073e-05
Arid3a	0.683538	2.25084e-05
Rbm14	0.683264	2.27465e-05
Fam160b1	0.682872	2.30921e-05
Gm6685	0.68273	2.32182e-05
Mapkap1	0.681782	2.40768e-05
Etv6	0.681484	2.43527e-05
Ext1	0.68028	2.54954e-05
Scaf8	0.680163	2.56094e-05
Dtnb	0.680125	2.56468e-05
Clcn7	0.680038	2.57313e-05
Ikbkap	0.678936	2.68289e-05
Med13l	0.677606	2.82093e-05
Snd1	0.677066	2.87877e-05
Tmem2	0.676691	2.91952e-05
Dhcr24	0.676658	2.92316e-05
Sh3bp1	0.676506	2.9399e-05
Fasn	0.675739	3.02547e-05
Papd4	0.675437	3.05975e-05
Faf1	0.674952	3.11566e-05
Specc1l	0.674621	3.15429e-05
Slc35d1	0.674524	3.16566e-05
Nf2	0.673938	3.23532e-05
Csnk2a2	0.67336	3.30543e-05
Ubr5	0.673212	3.32354e-05
Dusp10	0.673024	3.34677e-05
Frk	0.671017	3.60361e-05
Polr3b	0.670592	3.66024e-05
Rai14	0.67045	3.67933e-05
Usp24	0.670312	3.69804e-05
Zfp207	0.670021	3.73751e-05
Cnksr3	0.669768	3.77234e-05
Ascc3	0.667687	4.06903e-05
Gpc6	0.667011	4.16985e-05
Atxn1l	0.66643	4.25828e-05
Nfya	0.666101	4.30916e-05
Mcm5	0.664705	4.53094e-05
Etv3	0.663913	4.66117e-05
Slc25a13	0.663517	4.7277e-05
Foxp4	0.661276	5.11962e-05
Tyms	0.660688	5.22726e-05
Oxct1	0.65987	5.38019e-05
Apaf1	0.6563	6.09608e-05
Flcn	0.655844	6.19344e-05
Edem1	0.655136	6.34746e-05
Igf2bp3	0.654998	6.37786e-05
Map3k4	0.654947	6.38904e-05
Trerf1	0.654555	6.47622e-05
Tspan9	0.653077	6.81444e-05
Slc38a4	0.653068	6.81671e-05
Snapc3	0.653	6.83266e-05
Fer1l6	0.652519	6.94629e-05
Adk	0.652359	6.98458e-05
Smg5	0.651859	7.10506e-05
Lpp	0.6504	7.46787e-05
AW554918	0.650176	7.52483e-05
Xdh	0.64841	7.98921e-05
Akap9	0.648309	8.0164e-05
Ncor2	0.647626	8.20333e-05
Lrpprc	0.646881	8.41159e-05
Antxr2	0.646382	8.55365e-05
Zmpste24	0.646322	8.57096e-05
Aplf	0.646261	8.58834e-05
Zc3h7a	0.646055	8.64784e-05
Vdr	0.645261	8.88062e-05
Dcaf7	0.645063	8.93957e-05
Tspan11	0.645013	8.95446e-05
Tmtc3	0.643472	9.42602e-05
Xpnpep1	0.643437	9.4369e-05
Arhgap18	0.643029	9.56548e-05
Snx25	0.642912	9.60273e-05
Cnot6	0.642268	9.80954e-05
Ccdc80	0.641348	0.00010112
Drosha	0.641132	0.000101842
Msrb3	0.640924	0.000102542
Ift27	0.640647	0.000103479
Rab31	0.640512	0.000103939
Hus1	0.639594	0.000107117
Fbxo4	0.639498	0.000107454
Mdfic	0.639283	0.000108213
Gas2l1	0.639205	0.00010849
Rictor	0.639189	0.000108547
Ccdc50	0.638423	0.000111293
Tm9sf3	0.638289	0.000111781
Rpn1	0.637977	0.000112924
Snord95	0.636821	0.000117249
Cdk8	0.636556	0.000118258
Cdk5rap2	0.635848	0.000120999
Casp12	0.635694	0.000121604
Pcdh18	0.634799	0.000125164
Prim2	0.634261	0.000127347
Kdm4c	0.634073	0.00012812
Smchd1	0.633924	0.000128734
Utrn	0.632871	0.000133151
Zfp160	0.632465	0.000134893
Map2k2	0.632266	0.00013575
Ipo13	0.632165	0.00013619
Plekhh2	0.631961	0.000137081
Gm9008	0.631655	0.000138422
Tnc	0.631218	0.000140361
Tbx15	0.631134	0.000140737
Zmym4	0.63015	0.000145201
Heatr6	0.629686	0.00014735
Ptbp1	0.629132	0.000149952
Svep1	0.629089	0.000150154
Fndc3b	0.628856	0.000151266
Zc3h3	0.628301	0.000153934
Bclaf1	0.627978	0.000155505
Men1	0.625869	0.000166128
Nfic	0.625754	0.000166728
Bicc1	0.62506	0.000170373
2610037D02Rik	0.625027	0.000170548
Plec	0.624824	0.00017163
Brd1	0.6246	0.000172829
Fig4	0.623965	0.000176267
Psme4	0.62385	0.000176898
Asap1	0.623783	0.000177266
Evc	0.622938	0.000181962
Rhbdd1	0.622762	0.000182957
Pdzrn3	0.621546	0.000189944
Slc30a4	0.62151	0.000190154
Prr5	0.621301	0.000191378
Itgbl1	0.621126	0.000192411
Arhgap28	0.62102	0.000193037
Nhlrc3	0.61891	0.00020591
Rassf8	0.61878	0.000206732
Fam98a	0.618744	0.000206959
Tcf20	0.618687	0.000207317
Ctps2	0.618519	0.00020838
Deptor	0.618484	0.000208599
Nfib	0.618458	0.000208765
Osbpl9	0.617568	0.000214489
Rgma	0.617419	0.000215463
Olfr460	0.61685	0.000219208
Tle1	0.616634	0.000220649
Nuf2	0.616513	0.000221457
Arid2	0.616091	0.000224299
Ppp1r10	0.615907	0.000225546
Met	0.615856	0.000225898
Foxp1	0.615844	0.000225975
Ghr	0.61543	0.000228814
Pvt1	0.615078	0.000231252
Polrmt	0.615049	0.000231453
Fbxo5	0.614924	0.000232324
Lclat1	0.61447	0.000235518
Zkscan17	0.614209	0.000237369
Efna5	0.6141	0.000238152
Col6a1	0.613732	0.000240788
Skp2	0.61372	0.000240875
Pkdcc	0.61363	0.00024153
Arfip1	0.613606	0.0002417
Pla2g6	0.612873	0.00024706
Arhgap29	0.612754	0.000247936
Tbc1d22a	0.612158	0.000252383
Ifit2	0.611966	0.000253829
Cdc40	0.610728	0.000263346
Pabpc1	0.609423	0.000273713
Atp11c	0.609046	0.000276772
Tab1	0.608357	0.000282444
Ebf1	0.60812	0.000284418
Runx2	0.607867	0.000286545
Mkl1	0.606854	0.00029518
Abca7	0.606712	0.000296413
Nde1	0.606276	0.000300215
Vps13b	0.606162	0.000301221
Adamts12	0.606156	0.000301268
Glis3	0.606152	0.000301302
Birc5	0.605886	0.000303652
Tlr4	0.60586	0.00030388
St3gal3	0.605817	0.000304267
Ano10	0.605191	0.000309868
Immp1l	0.60493	0.000312233
Stk3	0.604781	0.000313587
Pcbp3	0.604007	0.000320707
Lipa	0.603331	0.000327052
Ddah2	0.603015	0.00033006
Brpf3	0.601331	0.000346474
Zfat	0.600514	0.000354693
Elac2	0.600132	0.000358597
Mllt3	0.600039	0.00035955
Slc29a3	0.599905	0.000360924
Pon2	0.599892	0.000361059
2610316D01Rik	0.599607	0.000364021
Ptprk	0.59955	0.000364612
Bnc2	0.598449	0.000376239
Nsfl1c	0.597916	0.000381987
Zfp442	0.597707	0.00038426
Spata6	0.597329	0.000388404
Tiam2	0.597315	0.000388565
Glipr1	0.59711	0.000390825
Slc6a9	0.596679	0.00039563
Mthfd2l	0.596406	0.000398694
Ptprf	0.59595	0.000403863
Abhd16a	0.595681	0.000406944
Dysf	0.595613	0.000407725
Brd2	0.595547	0.000408484
Prkar2b	0.595187	0.000412652
Chchd3	0.595167	0.000412877
Dlg1	0.593972	0.000426986
Cyp2j6	0.593028	0.000438427
Mgst1	0.591907	0.000452361
Srbd1	0.591708	0.000454884
Smoc1	0.591387	0.000458959
Prep	0.590588	0.000469265
Ehbp1	0.590342	0.000472468
Vta1	0.589403	0.000484911
Phc2	0.589029	0.000489945
Mrpl13	0.588936	0.000491216
Hbs1l	0.587955	0.000504667
Nudcd1	0.587923	0.000505108
Lrp12	0.586635	0.00052329
Tatdn2	0.586389	0.000526831
Safb2	0.586127	0.000530608
Smarcad1	0.585703	0.000536796
Lrrc42	0.585583	0.000538553
Ube3b	0.585057	0.000546339
Echdc1	0.584864	0.000549222
Cnot2	0.583221	0.000574285
Cyp4f16	0.5821	0.000591963
Dock8	0.58178	0.000597094
Mex3a	0.580667	0.000615248
Rell1	0.579564	0.000633719
Skap2	0.579224	0.000639515
Slc10a7	0.579152	0.000640741
Hddc2	0.577716	0.000665779
Tmem184b	0.577223	0.000674559
Ptk2	0.57689	0.000680548
Yif1a	0.576078	0.000695353
Tmcc1	0.575861	0.000699355
Trmt2a	0.575508	0.000705924
Ergic1	0.575037	0.000714757
Plscr3	0.575033	0.000714828
Mcm9	0.574692	0.000721298
Pld1	0.573482	0.000744611
Fer	0.572369	0.000766655
Mtap	0.571424	0.000785828
Msl2	0.569265	0.000831186
Txnrd3	0.567426	0.00087164
Zfand3	0.566092	0.00090203
Arid5b	0.565928	0.000905844
Wrn	0.565798	0.000908858
Gm17067	0.564837	0.000931497
Hsf2	0.56415	0.000947971
Sgsm3	0.562691	0.00098381
Snip1	0.558798	0.0010853
Tle2	0.556415	0.00115185
Jak2	0.556008	0.00116357
Cdc14a	0.555457	0.00117958
Ddr1	0.555218	0.00118661
Tnrc6b	0.554632	0.00120395
Gm16156	0.554263	0.001215
Nt5dc1	0.553739	0.00123081
Gm12666	0.553435	0.00124009
Tigd2	0.552346	0.00127376
Cdyl2	0.552302	0.00127512
Pam	0.551812	0.00129056
Stambpl1	0.551103	0.00131318
Osmr	0.55105	0.00131488
Xab2	0.549461	0.00136688
Lrba	0.549365	0.00137008
Tbc1d5	0.549216	0.00137505
Ndrg1	0.549089	0.0013793
Egfr	0.549054	0.00138048
L3mbtl3	0.547053	0.00144911
Zfp248	0.546664	0.00146279
Apoh	0.546074	0.00148375
Arfgef1	0.545063	0.0015203
Ehbp1l1	0.545014	0.0015221
Gpr108	0.544588	0.00153772
Cnot6l	0.543863	0.00156466
Cenpo	0.543706	0.00157054
Ccdc86	0.54298	0.00159802
Gulp1	0.541606	0.00165119
Eya1	0.541149	0.00166921
Vcam1	0.540647	0.00168921
Epm2a	-0.540083	0.00171192
BC017158	0.539832	0.00172212
Dip2a	0.538936	0.00175893
Aim2	0.538771	0.00176578
Pde5a	0.538059	0.00179561
Usp15	0.535873	0.00188995
Trmt11	0.535301	0.00191536
Slc38a1	0.535016	0.00192814
Rsrc1	0.534384	0.00195669
Sox5	-0.53412	0.00196873
Lmcd1	-0.534089	0.00197015
Zfp947	0.532916	0.00202448
Nat2	0.531482	0.0020926
Npr3	0.530427	0.00214405
BC005561	0.530193	0.00215556
Gm16268	0.530171	0.00215666
Rai1	0.529248	0.00220276
Mecom	0.528891	0.00222083
Med12l	-0.528274	0.00225235
Meis1	0.527393	0.00229804
Nkain2	-0.527178	0.00230932
Snrpn	-0.526322	0.00235464
Smyd3	0.525409	0.00240385
Mctp1	-0.525042	0.00242387
Zfp946	0.524888	0.00243231
Cdh11	-0.524402	0.00245914
Nrg1	0.523925	0.0024857
Abcd2	-0.523751	0.00249546
Aig1	-0.523623	0.00250269
Irs1	0.523437	0.00251319
Kcnab1	-0.523271	0.00252256
Pcdh15	-0.523234	0.00252469
Cdh13	-0.522046	0.00259286
Kcnb2	-0.521644	0.00261627
Dab2	0.521557	0.00262137
Gsta3	-0.521214	0.00264153
Alg6	0.521214	0.00264156
Vsnl1	-0.521123	0.00264695
Ccdc34	0.520729	0.00267032
Dgki	-0.520451	0.00268691
Cops5	0.518878	0.00278254
Akap6	-0.518698	0.00279369
Col11a1	-0.518677	0.00279498
Wisp1	0.518588	0.00280049
Cntn3	-0.517698	0.0028562
Lrp1b	-0.517609	0.00286182
Nlgn1	-0.517564	0.00286468
Mapk10	-0.516874	0.00290862
Palmd	-0.516835	0.00291109
Cntnap2	-0.516575	0.00292785
Tsga10	-0.516541	0.00293006
Ispd	-0.516519	0.00293144
Fam135b	-0.515903	0.00297148
Nalcn	-0.515806	0.0029778
Heca	0.515403	0.00300426
Abca8b	-0.515346	0.00300805
Khdrbs2	-0.515287	0.00301192
Pigk	0.515221	0.00301629
Rtn1	-0.515113	0.00302345
Homer2	-0.514618	0.0030564
Fgf14	-0.513908	0.00310426
Slc35f1	-0.513542	0.0031292
Unc5c	-0.51332	0.00314435
Elavl2	-0.513309	0.0031451
Myt1l	-0.513118	0.00315827
Nrxn3	-0.512642	0.00319115
Hook1	-0.512568	0.00319635
Pdzrn4	-0.512464	0.00320353
Gstm5	-0.512461	0.00320379
Grip1	-0.512269	0.00321716
Matk	-0.512072	0.00323101
Sorcs3	-0.511813	0.0032492
Dner	-0.511795	0.00325052
Stau2	-0.511298	0.00328571
Agmo	-0.511288	0.00328643
Phyhipl	-0.510922	0.00331263
Camk2b	-0.510674	0.00333042
Rab11fip4	-0.51047	0.00334518
Ppm1k	-0.510421	0.00334874
Cpne8	-0.51029	0.00335823
Plxnc1	-0.509892	0.00338721
Limch1	-0.509708	0.00340068
Kcnh3	-0.509577	0.00341029
Raver2	-0.508764	0.00347058
Fam19a2	-0.508753	0.00347142
Stxbp4	0.508642	0.00347969
Enpp3	0.508623	0.00348113
Grm8	-0.508316	0.00350414
Srgap3	-0.508127	0.00351845
Osbp2	-0.507898	0.00353577
Amy1	-0.507819	0.0035418
Opcml	-0.507768	0.00354564
Golga7b	-0.507694	0.00355129
Adamtsl1	-0.50743	0.00357142
Sgip1	-0.507312	0.00358052
Arap2	-0.507309	0.00358072
Hdac9	-0.507292	0.00358202
Atg7	0.507215	0.00358794
Mtss1	-0.506922	0.00361054
H60b	0.506864	0.003615
Trpm3	-0.506738	0.00362474
Cry1	0.506726	0.00362568
Gprin3	-0.506721	0.00362609
Ldb2	-0.506657	0.00363101
Traf3ip2	0.506522	0.0036415
Mrap2	-0.505838	0.00369513
Zdhhc14	-0.505636	0.00371103
Grik2	-0.505498	0.00372201
Osbpl6	-0.50542	0.00372821
Dnajc6	-0.505346	0.00373404
Dnm3	-0.505101	0.00375357
Cacng2	-0.504915	0.00376844
Zfpm2	-0.504647	0.00378999
Ica1	-0.503949	0.0038466
Gabrb1	-0.503817	0.00385736
Arnt2	-0.503615	0.00387395
Crim1	0.503015	0.00392342
9330182L06Rik	-0.502807	0.00394074
Angpt1	-0.502599	0.00395807
Pdzd2	-0.502441	0.00397135
Slc2a13	-0.502305	0.00398275
Ksr2	-0.502258	0.00398673
Rhpn1	-0.501923	0.00401498
Ppp1r9a	-0.501825	0.00402331
Lbh	0.501506	0.00405042
Atp2b2	-0.50122	0.00407487
Sema6b	-0.501115	0.00408385
Kcnh1	-0.50092	0.00410071
Slc24a3	-0.500912	0.00410138
Sfxn5	-0.499745	0.00420302
Ncald	-0.499661	0.00421046
Sorcs2	-0.499578	0.00421773
Gm3739	0.497437	0.00441048
Igsf3	-0.497333	0.00442006
Dlgap2	-0.497084	0.00444302
Kcnk10	-0.496318	0.00451419
9130401M01Rik	0.495523	0.00458923
Mthfd1l	0.495322	0.00460833
Arhgap26	-0.495263	0.00461396
Lifr	-0.494761	0.00466203
Grid1	-0.494321	0.00470457
Syn2	-0.494154	0.00472071
Dab1	-0.494067	0.0047292
Herc3	-0.493832	0.00475217
Abcb1a	-0.493751	0.00476006
Ech1	0.493118	0.00482241
Psd3	-0.492896	0.0048445
Ppp1r14c	-0.492763	0.00485771
Tmem132d	-0.492713	0.00486275
Prickle2	-0.492415	0.0048925
Dlgap1	-0.492397	0.00489432
Jazf1	-0.492214	0.00491267
Dlg2	-0.491607	0.00497417
Spata5	0.491324	0.005003
Kcnip4	-0.491264	0.00500911
Celsr2	-0.491104	0.00502551
Bank1	-0.491083	0.00502766
Nubpl	0.490698	0.00506733
Oxr1	0.489935	0.00514675
Rab30	-0.489825	0.00515821
Ptprcap	0.489597	0.00518219
Adamts6	0.489439	0.00519889
Cntln	0.489244	0.00521954
Lemd3	0.488239	0.00532703
Kank1	-0.488192	0.00533208
Adarb2	-0.487916	0.00536198
Celsr1	-0.487462	0.00541134
Reln	-0.487188	0.00544139
4930522L14Rik	0.486914	0.00547156
Abcc8	-0.486901	0.00547302
Hivep2	-0.48661	0.00550525
Nav3	-0.486604	0.00550583
Ppm1h	-0.486394	0.00552923
Fhl3	0.486101	0.00556192
Dnajc21	0.485421	0.00563852
Ptprm	-0.483512	0.00585818
Efr3a	0.48322	0.00589242
Stxbp6	-0.482986	0.00592005
Cdh4	-0.482586	0.00596739
Cntnap4	-0.482415	0.0059878
Ncdn	-0.482345	0.00599615
Sntb1	-0.481779	0.00606392
Spon1	-0.481771	0.00606497
Exoc6	-0.481552	0.00609135
Sema3d	-0.481314	0.00612019
Mfap5	0.48125	0.00612795
Tcte2	0.481026	0.0061553
Nhsl1	-0.480592	0.00620843
Rbfox2	0.480235	0.00625246
Adcy8	-0.479956	0.00628699
9530026P05Rik	-0.479512	0.00634242
Fuca2	0.479462	0.00634867
Sox2ot	-0.479393	0.00635724
Rmst	-0.479131	0.00639021
Ahr	0.478009	0.00653288
Pja2	-0.477911	0.00654557
Ank1	-0.477716	0.0065707
Alk	-0.477596	0.00658618
Kcnmb2	-0.477213	0.00663585
Slc13a4	-0.476826	0.00668634
Zfp944	0.476295	0.00675609
Smndc1	0.474928	0.00693886
Wscd2	-0.474851	0.00694916
Snora17	0.474684	0.00697179
Neurl1a	-0.474531	0.00699261
Slc1a3	-0.474272	0.00702788
Macrod2	-0.474149	0.00704481
Cep290	0.473315	0.00715973
Fras1	-0.472853	0.00722409
Casd1	0.472733	0.00724085
Hibadh	0.47247	0.00727777
Phkb	0.472259	0.00730757
Susd1	-0.47086	0.00750739
Rhobtb1	0.470111	0.00761625
Cacna1g	-0.470035	0.00762739
Txlnb	-0.469555	0.00769793
Pde4b	-0.468081	0.00791813
Prodh	-0.467991	0.00793174
Itgb4	0.46731	0.0080353
Kifap3	-0.467287	0.0080389
Col2a1	-0.467111	0.00806595
Gm6741	0.466494	0.00816108
Rcan2	-0.466363	0.00818151
Mpp6	0.465143	0.00837293
Ak5	-0.46479	0.00842902
Ntf3	-0.464389	0.00849314
Cntn6	-0.463385	0.00865539
Slc2a12	-0.462928	0.00873017
Zfp618	-0.462131	0.00886185
Abca4	-0.461997	0.0088843
Arhgap27	-0.461653	0.00894166
Nuak1	0.460953	0.00905965
Plch1	-0.46057	0.00912468
Prkce	-0.460229	0.00918305
Ttc27	0.459342	0.00933602
Ahi1	-0.457799	0.00960744
Purg	-0.457246	0.00970636
Armc2	-0.456423	0.00985499
Flrt2	-0.455316	0.0100581
Gm15834	0.453362	0.0104253
Atp13a5	0.452448	0.0106007
Gm4876	0.452402	0.0106097
8030451A03Rik	0.452067	0.0106747
Kdm4b	0.451954	0.0106968
Dlg4	-0.451062	0.0108718
Rabgap1l	-0.450907	0.0109025
Cript	0.4505	0.0109832
Ptn	0.45028	0.0110271
Chrm2	-0.450015	0.0110802
Eya4	-0.447973	0.0114965
Btbd11	-0.447431	0.0116093
Sorbs1	-0.446341	0.0118388
Nos1	-0.446022	0.0119067
Pfkm	-0.445969	0.0119179
Slc44a5	-0.445265	0.0120689
Cpeb3	-0.443798	0.012389
Adamts20	-0.442112	0.0127654
Cdh6	-0.439335	0.0134063
Hmga2	0.438761	0.0135422
Bbs7	0.438229	0.0136688
Dock4	-0.437347	0.0138814
Inpp4b	-0.436952	0.0139776
Rassf3	0.436714	0.0140357
Cenpw	0.436572	0.0140705
Atp2b1	-0.436051	0.0141986
Zbtb4	-0.435319	0.0143806
Syne1	-0.435309	0.0143831
Asxl3	-0.434683	0.0145401
Carf	-0.43317	0.0149259
Ano2	-0.432448	0.0151128
Zfp850	-0.431009	0.0154914
Fzd6	0.430392	0.015656
Eepd1	-0.430374	0.0156609
St7	0.430045	0.0157492
Cdk17	-0.429066	0.0160148
Fam13c	-0.428828	0.0160801
Rbm20	-0.428049	0.0162947
Pgk1	0.427343	0.0164915
Qk	-0.427026	0.0165804
Lmbrd2	0.425945	0.0168866
Myb	-0.424637	0.0172635
Gp1ba	0.424399	0.017333
Btrc	-0.42098	0.0183546
Nbea	-0.419777	0.018726
Cacna1c	-0.418209	0.0192191
Ltbp1	0.417095	0.0195757
Lmbrd1	-0.416622	0.0197288
Col23a1	-0.416593	0.0197385
Fbxl17	0.415245	0.0201805
Arntl	0.414512	0.0204241
Golga7	0.414196	0.0205302
Trps1	0.414148	0.020546
Zwint	-0.412317	0.0211687
Rfx3	-0.410943	0.0216463
Mkl2	-0.410887	0.021666
Syn3	-0.409698	0.0220866
Wdr25	0.408774	0.022418
Rorc	-0.406814	0.0231345
Hace1	0.406697	0.0231782
Cdh23	-0.405008	0.0238115
Tmem232	-0.40486	0.0238677
Zfp438	-0.403329	0.0244553
C1qtnf3	-0.401071	0.0253439
Rrp1	0.40073	0.0254803
Apol10b	0.400528	0.0255613
Snx10	-0.399228	0.0260881
Slco1a5	-0.398531	0.0263742
Wwox	0.397608	0.0267572
Veph1	0.397043	0.0269938
Shq1	0.396183	0.0273573
Gm10033	0.395597	0.0276076
Prex2	-0.394578	0.0280465
Peg3	-0.393958	0.0283163
Tjp3	-0.391444	0.0294327
Tmem132c	-0.390809	0.0297204
Smarca2	-0.389997	0.0300915
Crls1	0.388972	0.0305651
Chchd6	-0.388037	0.0310027
Pcmt1	0.386333	0.0318128
Gpx3	-0.384422	0.032742
Gm10327	-0.383723	0.0330873
Arhgef10	0.382217	0.0338409
Spata17	-0.381837	0.0340334
Tpk1	0.381638	0.0341346
Sclt1	0.381051	0.0344344
Nfe2	0.380597	0.0346676
Abcc5	0.378372	0.0358292
Gm9750	-0.377745	0.0361623
Chst11	0.373233	0.0386323
1110002E22Rik	-0.373127	0.0386924
Zfp81	0.373062	0.0387285
Hirip3	0.372748	0.038906
Ccdc91	-0.372196	0.0392193
Arl4a	-0.372076	0.0392876
Csgalnact1	0.370651	0.0401062
Fbxo32	-0.368476	0.0413822
Nt5dc3	-0.366811	0.0423807
1700025G04Rik	-0.366441	0.0426057
Gphn	-0.364126	0.0440321
Abca12	-0.362187	0.0452561
Dlc1	-0.362041	0.045349
Gnaq	-0.362011	0.0453684
Ntng1	-0.361459	0.0457229
Cd46	-0.360415	0.0463984
Tmcc3	-0.359711	0.0468582
Baiap2l2	-0.359049	0.0472942
Foxd2	0.358827	0.0474412
Adarb1	-0.358685	0.0475355
Atxn7l1	0.358366	0.0477477
Best3	-0.356026	0.0493264

## Sheet: Suppl.Table 11
Supplementary Table 11: Complete lists of enriched terms in B2 RNA regulated SRGs (B2-SRGs) that are up-regulated in HT22 cells treated with amyloid beta (see Suppl.Table 10 ) for Biological Process (left) and Cellular Compartment (right).
	An EASE score cut-off of 0.05 has been applied.
GO Biological Process					GO Cellular Compartment
Term	Count	P-Value	Fisher Exact		Term	Count	P-Value	Fisher Exact
regulation of apoptotic process	6	0.014	0.0036		transferase complex, transferring phosphorus-containing groups	4	0.0028	0.00021
regulation of programmed cell death	6	0.015	0.0038		nucleus	13	0.036	0.022
negative regulation of RNA metabolic process	5	0.028	0.0069
positive regulation of transforming growth factor beta receptor signaling pathway	2	0.03	0.00045
positive regulation of cellular response to transforming growth factor beta stimulus	2	0.03	0.00045
positive regulation of DNA-templated transcription, initiation	2	0.031	0.00049
RNA metabolic process	10	0.033	0.016
cell surface receptor signaling pathway	7	0.033	0.012
positive regulation of transcription, DNA-templated	5	0.04	0.011
negative regulation of nucleobase-containing compound metabolic process	5	0.04	0.011
regulation of DNA-templated transcription, initiation	2	0.04	0.00084
positive regulation of RNA biosynthetic process	5	0.041	0.011
positive regulation of RNA metabolic process	5	0.046	0.013

## Sheet: Suppl.Table 10
Supplementary Table 10:	List of B2 RNA regulated SRGs (B2-SRGs) (see Suppl.Table 1) that are up-regulated in HT22 cells treated with amyloid beta and Scr LNA compared to cells treated with the control peptide and scr LNA (see Suppl.Table 8 )
Total:	25 genes
4932438A13Rik
Adarb1
Arvcf
Bclaf1
Cep290
Dab2
Fosb
Gstcd
Men1
Mitf
Osbpl9
Oxr1
Pag1
Polrmt
Ptbp1
Ptprs
Rai1
Rb1cc1
Sema5a
Sgms1
Sorbs1
Tmem184b
Trmt2a
Vac14
Xab2

## Sheet: Suppl.Table 9
Supplementary Table 9:	List of genes that are up-regulated in HT22 cells treated with amyloid beta (see Suppl.Table 8) and in 6m old APP mice (see Suppl.Table 4 )
Total:	25 genes
4932438A13Rik
Abr
Epb41l3
Exosc10
Fam214b
Flna
Fosb
Itsn1
Klhl26
Lig3
Nat10
Nktr
Pag1
Pcdh1
Phf8
Ptprs
Sema5a
Sept2
Sgms1
Sh3glb1
Smc6
Tfdp2
Ulk1
Wnk1
Zc3h14

## Sheet: Suppl.Table 8
Supplementary Table 8:	Up-regulated genes in HT22 cells treated with amyloid beta and Scr LNA compared to cells treated with the control peptide and scr LNA. Values were calculated using DESeq (see methods) on long-RNA-seq data. Only genes with an FDR <0.2 are depicted.
	Gene Name	baseMean	log2FoldChange	lfcSE	stat	pvalue	padj
transcript:ENSMUST00000227484	Mbnl2	425.551	0.367987	0.111623	3.2967	0.000978293	0.0752863
transcript:ENSMUST00000023491	Lrch3	345.684	0.535571	0.173598	3.08513	0.00203466	0.135977
transcript:ENSMUST00000092678	Bclaf1	117.958	0.540244	0.162386	3.32692	0.000878109	0.0690403
transcript:ENSMUST00000170369	Racgap1	142.863	0.660278	0.213743	3.08913	0.00200746	0.134661
transcript:ENSMUST00000047903	Colgalt1	515.275	0.667336	0.203441	3.28024	0.00103718	0.0788342
transcript:ENSMUST00000096990	Cdc45	177.793	0.751313	0.213777	3.51448	0.000440618	0.0377886
transcript:ENSMUST00000108325	Cp	103.762	0.806857	0.208903	3.86236	0.000112299	0.0110692
transcript:ENSMUST00000028608	Nat10	103.824	0.830969	0.261184	3.18154	0.00146494	0.104613
transcript:ENSMUST00000163038	Xab2	79.8736	0.862826	0.268597	3.21234	0.00131657	0.0960512
transcript:ENSMUST00000211991	Nfatc3	39.6199	0.905127	0.307016	2.94815	0.00319687	0.188511
transcript:ENSMUST00000021857	Fars2	73.9808	0.9138	0.308726	2.95991	0.00307731	0.183344
transcript:ENSMUST00000169659	Pfkfb2	83.515	0.937166	0.286617	3.26975	0.00107644	0.0812953
transcript:ENSMUST00000124271	Acin1	41.0325	0.940938	0.315564	2.98176	0.00286593	0.173954
transcript:ENSMUST00000079881	Zfp398	68.8494	0.962631	0.301511	3.19269	0.00140955	0.10127
transcript:ENSMUST00000233964	Epb41l3	240.141	0.975774	0.318544	3.06323	0.00218961	0.144488
transcript:ENSMUST00000030830	H6pd	296.815	1.00763	0.246746	4.08367	4.43306e-05	0.00465241
transcript:ENSMUST00000087622	Plekha5	106.302	1.02211	0.262307	3.89662	9.75447e-05	0.00973249
transcript:ENSMUST00000212603	Tsnax	34.5793	1.03183	0.340712	3.02844	0.00245818	0.157022
transcript:ENSMUST00000000451	Raf1	261.498	1.03257	0.274709	3.75878	0.000170745	0.0163014
transcript:ENSMUST00000127357	Ttf2	108.463	1.04331	0.199604	5.22689	1.72389e-07	2.53362e-05
transcript:ENSMUST00000156513	Csnk1e	17.8759	1.06488	0.362367	2.93867	0.00329621	0.192619
transcript:ENSMUST00000202116	Tcf4	31.3845	1.07781	0.33182	3.24818	0.00116147	0.0863365
transcript:ENSMUST00000193628	Nprl2	28.7065	1.07834	0.315531	3.41754	0.000631907	0.0516312
transcript:ENSMUST00000094215	Mesd	275.662	1.1023	0.372646	2.95805	0.00309593	0.183998
transcript:ENSMUST00000135517	Grn	101.225	1.103	0.281635	3.91644	8.98663e-05	0.00906856
transcript:ENSMUST00000151626	Mdn1	27.7841	1.10413	0.308432	3.57983	0.00034382	0.0307528
transcript:ENSMUST00000172142	Nisch	151.343	1.11475	0.290144	3.84204	0.000122016	0.0119222
transcript:ENSMUST00000227462	Khnyn	43.4075	1.12067	0.341951	3.2773	0.00104806	0.0794059
transcript:ENSMUST00000060389	Rspry1	200.37	1.12294	0.325513	3.44976	0.000561081	0.0463792
transcript:ENSMUST00000154574	Ganc	25.7109	1.13512	0.366663	3.09582	0.00196271	0.13267
transcript:ENSMUST00000188679	Trmt1l	13.911	1.16175	0.396471	2.93024	0.00338699	0.196198
transcript:ENSMUST00000171960	Slc25a3	35.7302	1.18737	0.329773	3.60057	0.000317526	0.0286542
transcript:ENSMUST00000066582	Srcap	30.7457	1.22364	0.354754	3.44927	0.000562113	0.0464104
transcript:ENSMUST00000166311	Xrcc6	23.9209	1.25612	0.369274	3.40159	0.000669941	0.0542384
transcript:ENSMUST00000163059	Prpf3	21.365	1.25655	0.42631	2.9475	0.0032035	0.188642
transcript:ENSMUST00000212993	Wwp2	51.9239	1.26866	0.358396	3.53982	0.000400397	0.0348026
transcript:ENSMUST00000115086	Ei24	254.239	1.3743	0.439691	3.12561	0.00177438	0.122154
transcript:ENSMUST00000121204	Wdr61	76.4566	1.38256	0.372206	3.7145	0.000203603	0.0191036
transcript:ENSMUST00000214311	Kif15	14.5011	1.41348	0.469523	3.01046	0.00260855	0.163676
transcript:ENSMUST00000180020	Hnrnpf	84.5021	1.4163	0.465343	3.04357	0.00233791	0.151526
transcript:ENSMUST00000138081	Adi1	12.4391	1.41709	0.458005	3.09406	0.00197437	0.133077
transcript:ENSMUST00000137688	Dnajc7	19.0528	1.42335	0.437418	3.25399	0.00113798	0.085126
transcript:ENSMUST00000099514	Sgms1	69.4689	1.44318	0.417853	3.45379	0.000552766	0.0457453
transcript:ENSMUST00000020285	Sar1a	627.476	1.4456	0.30775	4.69731	2.63607e-06	0.000305129
transcript:ENSMUST00000186796	Matr3	178.82	1.48771	0.453591	3.27984	0.00103865	0.0788348
transcript:ENSMUST00000162178	Cyb5r3	59.5328	1.5199	0.275551	5.51586	3.47087e-08	7.43073e-06
transcript:ENSMUST00000118522	Paxbp1	174.458	1.52167	0.390444	3.89727	9.7282e-05	0.00971996
transcript:ENSMUST00000212099	Capn15	17.2925	1.53488	0.509373	3.01327	0.00258445	0.162885
transcript:ENSMUST00000090447	Nat10	31.2527	1.54538	0.51023	3.02879	0.00245537	0.156984
transcript:ENSMUST00000131408	Glb1l	18.2807	1.55709	0.479075	3.2502	0.00115326	0.0859966
transcript:ENSMUST00000199717	Ulk1	12.1597	1.57004	0.506436	3.10018	0.00193406	0.130983
transcript:ENSMUST00000113832	Eda2r	11.4114	1.60759	0.464173	3.46333	0.000533528	0.0443605
transcript:ENSMUST00000125043	Papd5	25.5074	1.61215	0.502461	3.20851	0.00133426	0.0970919
transcript:ENSMUST00000113669	Znrd1	25.0907	1.61768	0.538851	3.00209	0.00268136	0.16628
transcript:ENSMUST00000186826	2310022A10Rik	14.7192	1.66637	0.439273	3.79347	0.000148559	0.0143183
transcript:ENSMUST00000203067	Ppp4r2	27.4664	1.67616	0.531102	3.15601	0.00159942	0.111477
transcript:ENSMUST00000113565	Obsl1	155.397	1.68053	0.544062	3.08886	0.00200928	0.134661
transcript:ENSMUST00000124116	Dpy19l3	7.54384	1.68882	0.535474	3.15389	0.0016111	0.112003
transcript:ENSMUST00000134335	Dcakd	50.9842	1.72144	0.44453	3.87249	0.00010773	0.0106586
transcript:ENSMUST00000149736	Osbpl5	12.6778	1.73283	0.592063	2.92676	0.00342511	0.198231
transcript:ENSMUST00000130170	Kptn	8.03942	1.73429	0.578623	2.99727	0.00272406	0.167765
transcript:ENSMUST00000198254	Sh3glb1	413.48	1.74827	0.272329	6.41971	1.36532e-10	1.51124e-07
transcript:ENSMUST00000148733	Coro1b	7.66041	1.78913	0.611425	2.92617	0.00343164	0.198285
transcript:ENSMUST00000148656	Cnpy3	13.516	1.79786	0.438654	4.09858	4.15695e-05	0.00436912
transcript:ENSMUST00000163035	Psma3	46.6134	1.80391	0.554341	3.25416	0.0011373	0.085126
transcript:ENSMUST00000156464	Mrpl2	14.6479	1.83365	0.588068	3.11809	0.0018203	0.124349
transcript:ENSMUST00000195474	Nme7	16.7684	1.84565	0.599125	3.08058	0.00206597	0.13768
transcript:ENSMUST00000027876	Scyl3	55.1657	1.85726	0.482489	3.84933	0.00011844	0.0115888
transcript:ENSMUST00000162926	Gstcd	24.4442	1.86456	0.542891	3.4345	0.000593652	0.0488436
transcript:ENSMUST00000043552	Serpinb6a	186.444	1.86658	0.628436	2.97019	0.00297612	0.179428
transcript:ENSMUST00000100399	Xrcc6	46.1972	1.89131	0.415862	4.54792	5.41784e-06	0.000619032
transcript:ENSMUST00000160636	Gcc2	18.0174	1.90848	0.526077	3.62776	0.000285887	0.0261319
transcript:ENSMUST00000219870	Aes	97.1163	1.96702	0.655566	3.0005	0.00269541	0.166796
transcript:ENSMUST00000076791	4632433K11Rik	6.96854	1.96754	0.642336	3.0631	0.00219058	0.144488
transcript:ENSMUST00000222064	Gm46430	15.4751	1.99814	0.669279	2.98551	0.00283101	0.172589
transcript:ENSMUST00000148633	Sri	130.931	2.01911	0.442992	4.55789	5.16705e-06	0.000591331
transcript:ENSMUST00000218036	Plekhj1	21.0355	2.03061	0.618182	3.28481	0.0010205	0.0779913
transcript:ENSMUST00000163486	Naa16	39.1888	2.03312	0.691922	2.93837	0.00329946	0.192619
transcript:ENSMUST00000110104	Zc3h14	130.218	2.04233	0.378734	5.39253	6.9471e-08	1.27157e-05
transcript:ENSMUST00000113668	Aak1	64.689	2.11723	0.495296	4.27467	1.91424e-05	0.00209267
transcript:ENSMUST00000079362	Apc	7.95708	2.13871	0.730826	2.92643	0.00342878	0.198282
transcript:ENSMUST00000058735	Ubqln1	227.495	2.143	0.545893	3.92567	8.64884e-05	0.00875263
transcript:ENSMUST00000162210	Rb1cc1	29.8621	2.18389	0.550961	3.96378	7.37725e-05	0.00751949
transcript:ENSMUST00000226722	Itm2b	70.9029	2.22307	0.595933	3.73041	0.00019117	0.0180808
transcript:ENSMUST00000164235	Mapk1ip1l	41.5572	2.26221	0.750909	3.01262	0.00259	0.163005
transcript:ENSMUST00000128073	Atp5a1	42.7239	2.2726	0.488322	4.6539	3.2571e-06	0.000375786
transcript:ENSMUST00000146273	Rtel1	23.9717	2.29526	0.753109	3.04771	0.00230594	0.15026
transcript:ENSMUST00000107658	Nfe2l1	732.914	2.33469	0.660578	3.53431	0.000408843	0.0353632
transcript:ENSMUST00000161048	Wnk1	8.09615	2.33808	0.627364	3.72683	0.000193903	0.0183147
transcript:ENSMUST00000151336	Pdcd5	6.97025	2.39573	0.673255	3.55842	0.000373087	0.0327503
transcript:ENSMUST00000109688	Triobp	54.5213	2.44133	0.784463	3.1121	0.00185759	0.126652
transcript:ENSMUST00000198180	Csde1	1642.1	2.46052	0.806062	3.05252	0.00226925	0.149122
transcript:ENSMUST00000167457	Zfp426	46.3632	2.46131	0.654316	3.76165	0.000168797	0.0161371
transcript:ENSMUST00000047413	Mbd5	9.54949	2.49396	0.785571	3.17471	0.00149985	0.106249
transcript:ENSMUST00000078953	Dennd6b	15.8692	2.53546	0.850121	2.98247	0.00285931	0.173717
transcript:ENSMUST00000218170	Myl6	42.14	2.59474	0.718625	3.6107	0.000305375	0.0276988
transcript:ENSMUST00000092966	Dynlt1c	56.3228	2.61534	0.320081	8.17087	3.06184e-16	2.41001e-12
transcript:ENSMUST00000063339	Rarg	269.498	2.66984	0.908108	2.94	0.00328207	0.19215
transcript:ENSMUST00000059287	Ephb2	63.3715	2.72683	0.707522	3.85405	0.00011618	0.0114149
transcript:ENSMUST00000132012	Rai1	9.15448	2.89358	0.800365	3.61532	0.000299976	0.027314
transcript:ENSMUST00000115746	Clcn5	5.22781	2.8971	0.892509	3.24602	0.0011703	0.0869017
transcript:ENSMUST00000202543	Yes1	70.6647	2.95407	0.737589	4.00504	6.20069e-05	0.0064125
transcript:ENSMUST00000131361	Aifm2	7.42259	3.05555	0.881241	3.46732	0.000525667	0.0438097
transcript:ENSMUST00000141258	P4ha2	10.5112	3.14243	0.900224	3.49072	0.000481717	0.0406248
transcript:ENSMUST00000157899	Snord2	4.28998	3.15447	0.949478	3.32231	0.000892741	0.0698804
transcript:ENSMUST00000077735	Evl	28.317	3.19982	0.820359	3.90051	9.59901e-05	0.00960443
transcript:ENSMUST00000066597	Klhl26	53.1466	3.21592	0.946991	3.39594	0.000683945	0.055183
transcript:ENSMUST00000110536	Arid4b	81.1372	3.22454	1.0353	3.11459	0.00184203	0.125712
transcript:ENSMUST00000082416	mt-Ts2	32.9191	3.25234	1.0691	3.04212	0.00234915	0.151976
transcript:ENSMUST00000174218	Mtx1	13.14	3.32577	0.943691	3.52421	0.000424746	0.0365601
transcript:ENSMUST00000153252	Polr1e	4.73799	3.39598	1.08856	3.11971	0.0018103	0.123905
transcript:ENSMUST00000120119	Pgap2	13.961	3.47113	1.09501	3.16994	0.00152469	0.107364
transcript:ENSMUST00000019362	Dvl2	115.755	3.54623	0.855918	4.14319	3.4251e-05	0.00363225
transcript:ENSMUST00000107957	Fam214b	16.524	3.54877	1.18295	2.99994	0.00270032	0.16692
transcript:ENSMUST00000107537	Ube3a	69.7836	3.57837	1.19973	2.98264	0.00285771	0.173717
transcript:ENSMUST00000141998	Sp100	5.70659	3.63938	1.10887	3.28207	0.00103047	0.0784929
transcript:ENSMUST00000215902	Zfp809	12.9344	3.65146	1.09618	3.33109	0.000865072	0.0680908
transcript:ENSMUST00000150115	Osgepl1	7.85077	3.66712	1.06106	3.45611	0.00054804	0.0454604
transcript:ENSMUST00000069333	Cflar	15.019	3.67928	1.24951	2.94457	0.003234	0.189964
transcript:ENSMUST00000146948	4932438A13Rik	13.6367	3.73738	0.865923	4.31606	1.58836e-05	0.00175467
transcript:ENSMUST00000089450	Apol8	50.8418	3.73931	1.10353	3.38849	0.000702784	0.0565741
transcript:ENSMUST00000194478	Osbpl9	13.9364	3.74168	0.974964	3.83776	0.000124162	0.0121152
transcript:ENSMUST00000212897	Aasdhppt	6.03471	3.74229	1.10738	3.37942	0.000726395	0.0582762
transcript:ENSMUST00000195302	Stx6	15.5698	3.7858	0.966751	3.916	9.00314e-05	0.00907229
transcript:ENSMUST00000110124	Homer3	11.7332	3.83987	0.916026	4.19188	2.76655e-05	0.00296943
transcript:ENSMUST00000165309	Pex2	20.6557	3.9125	1.17866	3.31946	0.00090191	0.0705202
transcript:ENSMUST00000224480	Tut7	6.63817	3.92481	1.2912	3.03966	0.00236843	0.152805
transcript:ENSMUST00000068563	Acox3	8.6886	4.00843	0.884869	4.52998	5.89907e-06	0.00067077
transcript:ENSMUST00000136268	Dcun1d4	7.00496	4.01474	1.06095	3.78411	0.000154258	0.0148071
transcript:ENSMUST00000185644	Tfdp2	14.9371	4.0327	1.13791	3.54395	0.000394181	0.0343889
transcript:ENSMUST00000077548	Cttnbp2nl	22.8457	4.03881	1.20318	3.35678	0.000788555	0.0629068
transcript:ENSMUST00000151933	Zfp606	9.18883	4.04019	1.3254	3.04827	0.00230161	0.15026
transcript:ENSMUST00000012104	Ccnt1	128.748	4.07122	0.83623	4.86854	1.12423e-06	0.000132513
transcript:ENSMUST00000144236	Mcfd2	42.2856	4.14111	0.869177	4.76441	1.89408e-06	0.000219962
transcript:ENSMUST00000182337	Nktr	2.27927	4.15951	1.30382	3.19025	0.0014215	0.101716
transcript:ENSMUST00000178421	Eci2	4.25502	4.30528	1.22876	3.50377	0.000458722	0.0390576
transcript:ENSMUST00000127239	Trmt2a	20.8229	4.329	0.946587	4.57328	4.80155e-06	0.000551283
transcript:ENSMUST00000230743	Fkbp11	7.99793	4.33095	1.22511	3.53516	0.000407536	0.0352932
transcript:ENSMUST00000140164	Abi1	181.45	4.34285	1.11678	3.88871	0.000100777	0.00999864
transcript:ENSMUST00000164506	Ccdc43	49.383	4.46592	0.570083	7.83381	4.73321e-15	3.353e-11
transcript:ENSMUST00000126980	Btbd2	73.4685	4.46902	1.42157	3.14372	0.00166814	0.115514
transcript:ENSMUST00000061352	Rdx	50.4975	4.48979	1.34003	3.35051	0.000806633	0.0639887
transcript:ENSMUST00000132494	Gm28036	8.26791	4.49073	1.2018	3.73667	0.000186476	0.0177077
transcript:ENSMUST00000226047	Sorbs1	8.08794	4.50692	1.15307	3.90863	9.28219e-05	0.00930057
transcript:ENSMUST00000031694	Lmod2	1.74954	4.50993	1.49707	3.01251	0.00259097	0.163005
transcript:ENSMUST00000098236	Lrrc51	1.81504	4.55668	1.51339	3.01092	0.0026046	0.163635
transcript:ENSMUST00000205736	Zfp235	5.42141	4.64472	1.1668	3.98075	6.86983e-05	0.00706326
transcript:ENSMUST00000121798	Gm14411	1.89567	4.66086	1.46922	3.17233	0.00151218	0.106826
transcript:ENSMUST00000019975	Wasf1	22.2811	4.66432	1.53974	3.02929	0.00245133	0.156867
transcript:ENSMUST00000053427	Urgcp	5.63206	4.6788	1.10942	4.21733	2.47208e-05	0.00266955
transcript:ENSMUST00000034988	Rwdd2a	8.51041	4.70346	0.95282	4.93635	7.95969e-07	9.41343e-05
transcript:ENSMUST00000084525	Cdc26	14.7116	4.72566	1.12827	4.18843	2.80891e-05	0.00300579
transcript:ENSMUST00000125344	Mfsd2b	2.01598	4.73525	1.59718	2.96476	0.00302914	0.181851
transcript:ENSMUST00000118623	Dpf2	79.934	4.74256	0.763735	6.20969	5.30894e-10	3.6269e-07
transcript:ENSMUST00000170438	Celf2	19.9028	4.81854	1.34905	3.57181	0.000354519	0.0313927
transcript:ENSMUST00000147129	Cul4b	27.5248	4.83428	1.52154	3.17722	0.00148696	0.105547
transcript:ENSMUST00000135802	Kdm5a	15.7908	4.83523	1.63751	2.95279	0.00314919	0.186217
transcript:ENSMUST00000227429	Sema5a	25.5705	4.83841	1.41634	3.41614	0.000635157	0.051837
transcript:ENSMUST00000044616	Ints8	123.872	4.85068	1.38268	3.50816	0.00045121	0.0384664
transcript:ENSMUST00000156154	Men1	31.4614	4.88048	1.27407	3.83062	0.000127822	0.012421
transcript:ENSMUST00000168501	Phf8	90.3601	4.99668	1.1774	4.24382	2.19751e-05	0.00239127
transcript:ENSMUST00000065932	Gripap1	30.6444	5.06415	1.3784	3.67393	0.000238847	0.0220887
transcript:ENSMUST00000132210	Gm15787	2.66269	5.17512	1.38217	3.74418	0.000180982	0.0172554
transcript:ENSMUST00000042861	Stx11	25.3427	5.23062	1.1167	4.684	2.81336e-06	0.000325119
transcript:ENSMUST00000164470	Kars	15.1338	5.25241	1.46982	3.57351	0.000352233	0.0313076
transcript:ENSMUST00000081776	Apol9a	8.57092	5.30159	1.43484	3.6949	0.000219971	0.0204229
transcript:ENSMUST00000161527	Maf1	37.394	5.30778	1.50348	3.53034	0.000415026	0.035767
transcript:ENSMUST00000121484	Helz2	216.777	5.31162	1.56801	3.38749	0.000705351	0.0567163
transcript:ENSMUST00000114748	Atp5a1	514.026	5.35995	0.420335	12.7516	3.05406e-37	2.16349e-32
transcript:ENSMUST00000113941	Brd3	435.523	5.42319	1.84018	2.9471	0.00320767	0.18873
transcript:ENSMUST00000181517	2310001H17Rik	5.36141	5.48126	1.52656	3.5906	0.000329912	0.0295835
transcript:ENSMUST00000136682	Tbrg4	3.55785	5.5107	1.26196	4.36676	1.26102e-05	0.00140237
transcript:ENSMUST00000228181	Mettl6	3.97286	5.5553	1.25249	4.43541	9.18964e-06	0.00103005
transcript:ENSMUST00000046571	Odf2	9.33522	5.58917	1.68837	3.31038	0.000931682	0.0723688
transcript:ENSMUST00000171256	Smad2	17.309	5.60889	1.74642	3.21166	0.00131972	0.0961818
transcript:ENSMUST00000118583	Ltbp4	24.5873	5.65831	1.78598	3.16818	0.00153398	0.107698
transcript:ENSMUST00000131351	Nkapd1	57.4638	5.70711	0.554989	10.2833	8.3822e-25	1.97932e-20
transcript:ENSMUST00000077196	Krt80	18.5916	5.71524	1.27795	4.47218	7.74249e-06	0.0008706
transcript:ENSMUST00000232552	Hmga1	7.32695	5.77473	1.20418	4.79558	1.62205e-06	0.000189613
transcript:ENSMUST00000005067	Sgta	36.5016	5.78942	1.65449	3.49921	0.000466638	0.0395414
transcript:ENSMUST00000198400	Klhl18	30.9509	5.92772	0.9195	6.44668	1.14329e-10	1.34985e-07
transcript:ENSMUST00000124894	Dynlt1c	5.38349	6.00127	1.32569	4.52691	5.98511e-06	0.000679463
transcript:ENSMUST00000150959	Trnau1ap	4.82878	6.03346	1.25212	4.81857	1.44588e-06	0.00016958
transcript:ENSMUST00000223467	Nol8	25.0773	6.06333	2.00762	3.02016	0.0025264	0.159759
transcript:ENSMUST00000105406	Adarb1	28.6103	6.08788	1.72342	3.53244	0.000411745	0.0355708
transcript:ENSMUST00000188145	Edem3	49.4667	6.13691	1.82875	3.3558	0.000791348	0.0629877
transcript:ENSMUST00000224892	Jade3	31.3644	6.16088	2.01943	3.0508	0.00228229	0.149701
transcript:ENSMUST00000089684	Rubcn	23.5026	6.23432	1.70793	3.65021	0.000262023	0.0241061
transcript:ENSMUST00000159825	Pag1	10.8004	6.26536	1.67434	3.74199	0.000182569	0.0173833
transcript:ENSMUST00000143872	Ankrd13b	9.58281	6.32436	1.97282	3.20575	0.00134711	0.0974761
transcript:ENSMUST00000131320	Asb7	15.9037	6.37316	1.99085	3.20122	0.00136846	0.0989202
transcript:ENSMUST00000105715	Mfn2	40.0663	6.39542	1.82302	3.50815	0.000451236	0.0384664
transcript:ENSMUST00000183087	Bvht	7.93238	6.5408	1.20958	5.40751	6.39077e-08	1.18514e-05
transcript:ENSMUST00000115613	Arvcf	23.9083	6.59084	2.03316	3.24167	0.00118833	0.0877802
transcript:ENSMUST00000231825	Hmga1	13.701	6.71913	1.29183	5.20123	1.97971e-07	2.65329e-05
transcript:ENSMUST00000203884	Mitf	13.8838	6.86214	2.00479	3.42287	0.000619637	0.0507458
transcript:ENSMUST00000162694	Polrmt	21.579	6.91032	1.94348	3.55565	0.000377046	0.0330568
transcript:ENSMUST00000085758	Radil	16.1664	6.91548	1.30502	5.29915	1.16343e-07	1.91224e-05
transcript:ENSMUST00000030991	Tnip2	22.0699	6.91914	2.19287	3.15528	0.00160341	0.111577
transcript:ENSMUST00000220574	Gstz1	10.2141	7.08868	1.21667	5.82631	5.66672e-09	2.23017e-06
transcript:ENSMUST00000112880	Zfp422	20.4256	7.29554	2.4792	2.94269	0.00325371	0.190963
transcript:ENSMUST00000111194	Cd44	55.8669	7.46231	2.37653	3.14	0.00168946	0.116762
transcript:ENSMUST00000118483	Rps6kb2	18.5707	7.51192	2.48201	3.02655	0.00247361	0.157581
transcript:ENSMUST00000025058	Anks1	44.379	7.57448	2.27223	3.3335	0.000857601	0.0675928
transcript:ENSMUST00000186634	Gramd1a	17.6451	7.61553	2.49897	3.04747	0.00230774	0.15026
transcript:ENSMUST00000213003	Vac14	34.0962	7.62293	2.47172	3.08406	0.00204196	0.136336
transcript:ENSMUST00000105675	Park7	26.7314	7.77543	2.59434	2.99708	0.00272583	0.167765
transcript:ENSMUST00000176752	Mia2	25.6415	7.79377	2.19812	3.54566	0.000391633	0.034251
transcript:ENSMUST00000065694	Dis3l2	18.7311	7.83723	2.53384	3.09303	0.00198122	0.13336
transcript:ENSMUST00000124136	Trim26	22.4134	8.19905	2.53611	3.23292	0.0012253	0.0900417
transcript:ENSMUST00000126706	Psip1	24.319	8.33218	2.8434	2.93036	0.00338573	0.196198
transcript:ENSMUST00000173347	Lig3	33.0176	8.61165	2.85236	3.01913	0.00253501	0.159911
transcript:ENSMUST00000107253	Rfx5	34.3701	8.62822	2.4868	3.46961	0.000521221	0.0435416
transcript:ENSMUST00000063542	Naa50	62.7018	9.45291	2.62746	3.59774	0.000320997	0.0288938
transcript:ENSMUST00000161701	Pcdh1	56.0082	9.57076	1.10035	8.69795	3.37922e-18	4.23598e-14
transcript:ENSMUST00000221721	Pcnx	100.591	9.92342	2.70833	3.66403	0.000248274	0.0229305
transcript:ENSMUST00000095457	Ptbp1	239.584	10.1843	3.42198	2.97615	0.00291894	0.176281
transcript:ENSMUST00000084035	Adam9	268.04	10.2631	3.42195	2.9992	0.0027069	0.167181
transcript:ENSMUST00000130007	Flna	418.055	10.2789	3.42196	3.0038	0.0026663	0.165826
transcript:ENSMUST00000173722	Lig3	101.946	10.2983	2.72382	3.78085	0.000156294	0.0149822
transcript:ENSMUST00000174408	Jmjd1c	400.51	10.4215	3.42191	3.04552	0.00232282	0.150962
transcript:ENSMUST00000218022	Smc6	284.876	11.7982	1.04863	11.251	2.28975e-29	8.11029e-25
transcript:ENSMUST00000205303	Herc2	588.561	11.8382	3.42174	3.45971	0.000540751	0.0449083
transcript:ENSMUST00000090096	Oxr1	317.928	12.0146	3.05235	3.93619	8.27839e-05	0.00841379
transcript:ENSMUST00000110663	Dab2	26.4448	18.5336	3.62017	5.11954	3.06283e-07	3.66504e-05
transcript:ENSMUST00000225785	Ptprs	30.274	18.6313	3.62015	5.14655	2.65325e-07	3.18031e-05
transcript:ENSMUST00000195860	Map4k4	36.0362	18.7565	3.62013	5.18116	2.20511e-07	2.81968e-05
transcript:ENSMUST00000230112	Lmf2	39.4203	18.821	3.62012	5.199	2.00365e-07	2.65329e-05
transcript:ENSMUST00000192509	Map4k4	45.1824	18.9191	3.62011	5.22612	1.73104e-07	2.53886e-05
transcript:ENSMUST00000148601	Acox1	51.1275	19.0078	3.6201	5.25064	1.51571e-07	2.34952e-05
transcript:ENSMUST00000108407	Abr	54.4201	19.0528	3.62009	5.26308	1.41658e-07	2.20067e-05
transcript:ENSMUST00000113927	Zfx	68.7813	19.2211	3.62007	5.30958	1.0988e-07	1.82967e-05
transcript:ENSMUST00000109727	Mta1	71.615	19.2504	3.62007	5.31769	1.05094e-07	1.81141e-05
transcript:ENSMUST00000178522	Tmem184b	77.9686	19.3111	3.62007	5.33447	9.58251e-08	1.65567e-05
transcript:ENSMUST00000208505	Fosb	113.849	19.5829	3.62005	5.40956	6.31785e-08	1.18514e-05
transcript:ENSMUST00000208326	Fosb	132.438	19.6914	3.62004	5.43955	5.3414e-08	1.02822e-05
transcript:ENSMUST00000101617	Flnc	150.102	19.7812	3.62004	5.46435	4.6461e-08	9.21932e-06
transcript:ENSMUST00000172165	Sept2	175.059	19.89	3.62004	5.49443	3.91976e-08	8.13951e-06
transcript:ENSMUST00000056889	Chd4	184.493	19.929	3.62003	5.50521	3.68736e-08	7.75111e-06
transcript:ENSMUST00000197662	Abcd3	26.9934	21.9675	3.5346	6.215	5.13253e-10	3.6269e-07
transcript:ENSMUST00000127956	Gm28036	27.1322	21.9716	3.5346	6.21614	5.09531e-10	3.6269e-07
transcript:ENSMUST00000219765	Cep290	21.8822	22.124	3.53479	6.25892	3.87651e-10	3.19316e-07
transcript:ENSMUST00000088169	Rtn3	48.2367	22.2087	3.53425	6.28386	3.30279e-10	2.75258e-07
transcript:ENSMUST00000203895	Plk4	34.2897	22.6523	3.53443	6.40902	1.46455e-10	1.59613e-07
transcript:ENSMUST00000150232	Mtch2	35.7782	22.7639	3.53441	6.44064	1.1897e-10	1.35933e-07
transcript:ENSMUST00000073308	Ewsr1	41.0491	22.9569	3.53433	6.4954	8.2812e-11	1.08637e-07
transcript:ENSMUST00000145567	Cul7	41.2088	22.9594	3.53433	6.49611	8.2423e-11	1.08637e-07
transcript:ENSMUST00000076022	Exosc10	46.32	23.0624	3.53427	6.52535	6.78438e-11	9.80828e-08
transcript:ENSMUST00000113996	Itsn1	46.7992	23.1346	3.53427	6.54579	5.91834e-11	9.52259e-08
transcript:ENSMUST00000079659	U2surp	91.2001	23.3494	3.56266	6.55393	5.60425e-11	9.2503e-08
transcript:ENSMUST00000113514	Wdfy1	76.6087	23.5336	3.50031	6.72329	1.77671e-11	4.06007e-08
transcript:ENSMUST00000097836	Hp1bp3	113.771	24.084	3.50016	6.88082	5.95083e-12	1.91617e-08
transcript:ENSMUST00000177163	Rpl41	111.647	24.2341	3.534	6.8574	7.01264e-12	2.15989e-08
transcript:ENSMUST00000109790	Asxl1	107.494	24.6791	3.53401	6.98331	2.88308e-12	1.02119e-08

## Sheet: Suppl.Table 7
Supplementary Table 7: Complete lists of enriched terms in B2 RNA regulated SRGs (B2-SRGs) that are upregulated in 6 month old APP mice compared to WT (see Suppl.Table5 ) for Biological Process (left) and Cellular Compartment (right).
	An EASE score cut-off of 0.05 has been applied.
GO Biological Process					GO Cellular Compartment
Term	Count	P-Value	Fisher Exact		Term	Count	P-Value	Fisher Exact
nervous system development	15	0.0054	0.0024		ion channel complex	5	0.01	0.0017
vocal learning	2	0.019	0.00014		transmembrane transporter complex	5	0.014	0.0024
voluntary musculoskeletal movement	2	0.019	0.00014		cation channel complex	4	0.018	0.0023
intracellular signal transduction	16	0.023	0.012		voltage-gated potassium channel complex	3	0.029	0.0025
observational learning	2	0.024	0.00023
auditory behavior	2	0.028	0.00034
negative regulation of sequestering of calcium ion	3	0.032	0.0029
release of sequestered calcium ion into cytosol	3	0.032	0.0029
calcium ion import into cytosol	3	0.032	0.0029
regulation of sequestering of calcium ion	3	0.043	0.0045
sequestering of calcium ion	3	0.043	0.0045
axon extension	3	0.045	0.0049
synapse assembly	3	0.047	0.0053
neurogenesis	10	0.049	0.023

## Sheet: Suppl.Table 6
Supplementary Table 6:	List of B2 RNA regulated SRGs (B2-SRGs) (see Suppl.Table1) that are upregulated in 6 month old APP mice (see Suppl.Table 4) and are associated with learning based on Peleg et al, Science 2010.
Total:	13 genes
Apba2
Ctif
Gria4
Hipk2
Kcnc1
Kcnt2
Mpdz
Pisd
Ppp6r3
Ptprs
Smoc2
Sybu
Zhx2

## Sheet: Suppl.Table 5
Supplementary Table 5:	List of B2 RNA regulated SRGs (B2-SRGs) (see Suppl.Table 1) that are upregulated in 6 month old APP mice compared to WT (see Suppl.Table 4)
Total:	72 genes
4932438A13Rik
Abcg2
Ank2
Anks1b
Apba2
Arid1b
Btbd9
Cacna2d1
Cenpt
Csmd2
Ctif
Cyth4
Dagla
Dclk1
Erc1
Fbln2
Fbxo18
Fosb
Foxn3
Foxo3
Frmd4a
Frmd4b
Gabra2
Grb10
Gria4
Hipk2
Htt
Il1rap
Iqsec1
Itpr1
Kbtbd11
Kcnc1
Kcnq3
Kcnt2
Klf15
Magi1
Magi2
Mdga1
Mical3
Mpdz
Nr2c1
Nrxn1
Nrxn2
Pag1
Palld
Pcdha11
Pde10a
Phf21b
Pisd
Pkd1
Plce1
Plxna4
Ppfibp1
Ppp6r3
Prdm5
Prkag2
Prpf38b
Ptprs
Rnf220
Scmh1
Sema5a
Sgk1
Sgms1
Slc35f3
Smoc2
Sorbs2
Srrm4
Srrt
Sybu
Tns3
Usp19
Zhx2

## Sheet: Suppl.Table 4
Supplementary Table 4:	Up-regulated genes in hippocampi of APP 6m old mice compared to 6m WT mice. Values were calculated using DESeq (see methods) on long-RNA-seq data. Only genes with an FDR <0.2 are depicted.
	Gene Name	baseMean	log2FoldChange	lfcSE	stat	pvalue	padj
transcript:ENSMUST00000080036	Htt	2401.16	0.328513	0.1092	3.00835	0.00262666	0.152828
transcript:ENSMUST00000102888	Camk2a	20750.2	0.352421	0.0938818	3.75388	0.000174117	0.0217066
transcript:ENSMUST00000115797	Arid1b	1219.19	0.354137	0.097326	3.63867	0.000274047	0.0312237
transcript:ENSMUST00000048988	Znfx1	424.849	0.359934	0.120926	2.97647	0.00291585	0.163095
transcript:ENSMUST00000033341	Tub	1914.77	0.37371	0.127214	2.93764	0.00330717	0.174921
transcript:ENSMUST00000107479	Rapgefl1	1201.87	0.38482	0.110118	3.4946	0.000474769	0.0460467
transcript:ENSMUST00000075444	Ddn	10750	0.38516	0.121304	3.17517	0.00149749	0.105929
transcript:ENSMUST00000070256	Kcnq3	2922.62	0.387963	0.127503	3.04278	0.00234404	0.142441
transcript:ENSMUST00000120129	Prr14l	1321.91	0.409206	0.138815	2.94784	0.00319998	0.172297
transcript:ENSMUST00000039627	Tspoap1	1201.48	0.416534	0.136201	3.05823	0.00222645	0.136844
transcript:ENSMUST00000044155	Ubash3b	370.932	0.422877	0.147149	2.87381	0.00405555	0.198743
transcript:ENSMUST00000034592	Dscaml1	656.005	0.427697	0.146604	2.91737	0.00353001	0.182259
transcript:ENSMUST00000016105	Adss	555.676	0.428016	0.146175	2.9281	0.00341038	0.178382
transcript:ENSMUST00000106015	Adgrb2	2155.42	0.428801	0.131901	3.25092	0.00115033	0.0865548
transcript:ENSMUST00000037912	Ssh2	671.988	0.430452	0.143393	3.00191	0.00268295	0.154757
transcript:ENSMUST00000091259	Slc7a14	2268.93	0.447407	0.12289	3.64072	0.000271879	0.0310615
transcript:ENSMUST00000036884	Klf9	1321.31	0.449077	0.12502	3.59204	0.000328098	0.0352996
transcript:ENSMUST00000110625	Ppip5k1	570.454	0.449324	0.150926	2.97711	0.0029098	0.16291
transcript:ENSMUST00000105778	Prdm2	816.007	0.45137	0.147021	3.0701	0.00213988	0.133892
transcript:ENSMUST00000041685	Neurod2	667.424	0.4563	0.148834	3.06584	0.00217061	0.135099
transcript:ENSMUST00000030784	Prkag2	589.073	0.458311	0.151876	3.01767	0.0025473	0.150009
transcript:ENSMUST00000086465	Adora1	640.701	0.46594	0.137993	3.37655	0.000734022	0.0635714
transcript:ENSMUST00000104955	Sowaha	1030.45	0.469965	0.140028	3.35624	0.000790109	0.0662449
transcript:ENSMUST00000034197	St3gal2	798.43	0.470729	0.149801	3.14236	0.00167589	0.11469
transcript:ENSMUST00000045291	Kmt2c	1451.06	0.472149	0.119288	3.95805	7.55655e-05	0.0109451
transcript:ENSMUST00000096430	Zhx2	298.291	0.479038	0.146431	3.27141	0.00107011	0.0830579
transcript:ENSMUST00000086023	Galnt17	1015.3	0.48239	0.159967	3.01556	0.00256505	0.150604
transcript:ENSMUST00000206720	Cbl	1372.06	0.486598	0.168703	2.88434	0.00392231	0.194056
transcript:ENSMUST00000102484	Ddi2	648.125	0.491542	0.170458	2.88365	0.00393095	0.194297
transcript:ENSMUST00000046859	Foxn3	667.059	0.493283	0.16994	2.9027	0.00369967	0.18728
transcript:ENSMUST00000108759	Slc35f3	234.91	0.494573	0.168034	2.9433	0.00324737	0.172957
transcript:ENSMUST00000025053	Mllt1	458.652	0.495564	0.158179	3.13293	0.0017307	0.116829
transcript:ENSMUST00000036267	Chst2	1729.07	0.496302	0.115358	4.30228	1.69047e-05	0.00316982
transcript:ENSMUST00000032891	Smg1	2953.87	0.496625	0.14185	3.50105	0.000463427	0.0451696
transcript:ENSMUST00000188142	Peak1	541.241	0.496697	0.157183	3.16	0.00157772	0.110214
transcript:ENSMUST00000072141	Pdcd11	271.188	0.499593	0.148325	3.36822	0.000756549	0.0645605
transcript:ENSMUST00000107094	Jun	682.618	0.503866	0.15439	3.2636	0.00110006	0.0843849
transcript:ENSMUST00000056028	Sbk1	617.718	0.513594	0.140806	3.64752	0.000264779	0.0303679
transcript:ENSMUST00000192069	Tnr	2506.33	0.515716	0.132722	3.88569	0.000102041	0.0141645
transcript:ENSMUST00000144211	Srrm3	190.397	0.516597	0.175269	2.94745	0.00320406	0.172328
transcript:ENSMUST00000105502	Foxo3	780.334	0.519388	0.174976	2.96834	0.00299416	0.165987
transcript:ENSMUST00000005719	Adcy9	736.298	0.519942	0.168163	3.09189	0.00198889	0.126881
transcript:ENSMUST00000163139	Plxna1	1492.48	0.522178	0.106045	4.92409	8.47529e-07	0.000230692
transcript:ENSMUST00000168787	Btbd9	949.042	0.523838	0.17769	2.94804	0.00319792	0.172297
transcript:ENSMUST00000160721	Pcdh1	1113.41	0.525537	0.167926	3.12958	0.00175059	0.117634
transcript:ENSMUST00000113157	Setd5	560.587	0.525649	0.176139	2.98428	0.00284245	0.160203
transcript:ENSMUST00000193045	Pcdhga12	190.247	0.525712	0.179699	2.92552	0.00343877	0.17943
transcript:ENSMUST00000208089	Picalm	261.783	0.530315	0.180114	2.94432	0.00323662	0.172856
transcript:ENSMUST00000037666	Mfhas1	536.811	0.532646	0.150424	3.54098	0.000398651	0.0406679
transcript:ENSMUST00000020706	Adcy1	10834.3	0.535341	0.112975	4.73856	2.15244e-06	0.000523193
transcript:ENSMUST00000015449	Sash1	1348.12	0.535404	0.143383	3.73409	0.000188393	0.0232795
transcript:ENSMUST00000095078	Lrrc8a	481.83	0.535647	0.16963	3.15774	0.00158995	0.110615
transcript:ENSMUST00000091789	Mbp	664.921	0.541329	0.158414	3.41719	0.000632715	0.0570564
transcript:ENSMUST00000034136	Gpt2	525.798	0.543904	0.11744	4.63135	3.63291e-06	0.000851513
transcript:ENSMUST00000069399	Kbtbd11	2031.49	0.545058	0.12675	4.30027	1.70587e-05	0.00317851
transcript:ENSMUST00000021458	Sptb	2518.72	0.545726	0.14822	3.68188	0.000231523	0.0275708
transcript:ENSMUST00000053986	Lingo3	209.247	0.548156	0.190672	2.87486	0.00404201	0.198458
transcript:ENSMUST00000041093	Creb3l2	185.052	0.553226	0.170061	3.2531	0.00114151	0.0860008
transcript:ENSMUST00000166004	Mast3	1867.25	0.554893	0.157385	3.52571	0.000422346	0.0422756
transcript:ENSMUST00000055341	Gfod1	1353.44	0.558172	0.164391	3.3954	0.000685284	0.0606852
transcript:ENSMUST00000033450	Gpc4	347.771	0.559422	0.166729	3.35528	0.000792853	0.0663324
transcript:ENSMUST00000079195	Stox2	1998.84	0.560507	0.173727	3.22637	0.00125372	0.0927071
transcript:ENSMUST00000106746	Helz	1040.12	0.564106	0.183807	3.06902	0.00214766	0.133953
transcript:ENSMUST00000020958	Klhl29	525.973	0.566757	0.133405	4.2484	2.15305e-05	0.0038537
transcript:ENSMUST00000115096	Plxna4	2841.62	0.568747	0.129851	4.38002	1.18671e-05	0.002321
transcript:ENSMUST00000026917	Nrp1	660.074	0.572871	0.194606	2.94376	0.00324254	0.172856
transcript:ENSMUST00000159397	Wnk1	280.613	0.573017	0.187051	3.06343	0.00218817	0.135446
transcript:ENSMUST00000069620	Per2	309.076	0.577781	0.171366	3.37162	0.000747285	0.0642784
transcript:ENSMUST00000030025	Nr4a3	750.23	0.578042	0.197809	2.92222	0.0034755	0.180398
transcript:ENSMUST00000041272	Plekhm1	234.119	0.580021	0.188541	3.07636	0.00209543	0.131669
transcript:ENSMUST00000160860	Klhl3	708.169	0.582531	0.19892	2.92847	0.00340636	0.178369
transcript:ENSMUST00000053764	Foxo1	545.263	0.586176	0.16546	3.5427	0.000396054	0.0405431
transcript:ENSMUST00000096363	Tmem28	246.291	0.586751	0.191552	3.06314	0.00219026	0.135446
transcript:ENSMUST00000005671	Igf1r	977.385	0.587064	0.166345	3.52918	0.000416842	0.0420157
transcript:ENSMUST00000060311	Hip1	360.365	0.588731	0.184273	3.19489	0.00139884	0.100638
transcript:ENSMUST00000025202	Kcnc1	958.283	0.592589	0.189533	3.12658	0.00176852	0.118167
transcript:ENSMUST00000078496	Cacna1h	664.894	0.592593	0.11854	4.99912	5.7592e-07	0.000167035
transcript:ENSMUST00000165559	Ctif	717.532	0.592601	0.16871	3.51253	0.000443856	0.043622
transcript:ENSMUST00000069837	Slit3	645.61	0.592944	0.195532	3.03247	0.0024256	0.145452
transcript:ENSMUST00000172753	Hspa1b	118.334	0.593466	0.191138	3.10491	0.00190337	0.124257
transcript:ENSMUST00000039327	Dagla	1010.45	0.593665	0.130925	4.5344	5.77676e-06	0.00123627
transcript:ENSMUST00000189400	Paqr8	1909.68	0.597847	0.150391	3.97529	7.02929e-05	0.0103539
transcript:ENSMUST00000169141	Slit1	870.973	0.603953	0.178533	3.38287	0.000717327	0.0627663
transcript:ENSMUST00000162295	Clstn2	838.891	0.604209	0.197866	3.05363	0.00226091	0.13802
transcript:ENSMUST00000161779	Hipk2	1221.93	0.60445	0.176509	3.42447	0.000616007	0.0559771
transcript:ENSMUST00000020695	Tns3	832.455	0.605636	0.147363	4.10982	3.9597e-05	0.00642538
transcript:ENSMUST00000094077	Kdm6b	364.707	0.60726	0.210678	2.88241	0.00394649	0.194903
transcript:ENSMUST00000072837	Foxk1	716.481	0.609302	0.129717	4.69715	2.63817e-06	0.000625807
transcript:ENSMUST00000020288	Eif4ebp2	660.18	0.609912	0.205475	2.9683	0.00299454	0.165987
transcript:ENSMUST00000102578	Ankrd13a	237.32	0.610498	0.180605	3.38029	0.00072409	0.0630813
transcript:ENSMUST00000050328	Eif2s3x	1125.93	0.619111	0.16938	3.65516	0.000257023	0.0296511
transcript:ENSMUST00000036328	Zfhx2	757.745	0.627053	0.126692	4.94943	7.44296e-07	0.000207371
transcript:ENSMUST00000035565	Pkd1	1164.15	0.627293	0.194953	3.21766	0.00129243	0.0943177
transcript:ENSMUST00000107032	Arhgef17	1986.03	0.628091	0.098192	6.39656	1.58914e-10	1.13089e-07
transcript:ENSMUST00000141055	Otub2	201.315	0.640581	0.216764	2.95521	0.0031246	0.169701
transcript:ENSMUST00000110766	Fbxl18	390.922	0.640895	0.179611	3.56824	0.000359385	0.0377712
transcript:ENSMUST00000178486	Kmt2d	2531.75	0.641147	0.122001	5.25527	1.47807e-07	5.42258e-05
transcript:ENSMUST00000082432	Dio2	855.087	0.643771	0.199561	3.22593	0.00125564	0.0927071
transcript:ENSMUST00000224954	Daam2	903.985	0.650512	0.137763	4.72197	2.3357e-06	0.000560814
transcript:ENSMUST00000034279	Gse1	862.774	0.650903	0.122601	5.3091	1.10171e-07	4.22555e-05
transcript:ENSMUST00000175916	Prox1	1278.75	0.66474	0.218685	3.03971	0.00236803	0.143152
transcript:ENSMUST00000178075	Usp19	207.459	0.667048	0.195485	3.41227	0.000644241	0.0577431
transcript:ENSMUST00000189545	Rasgrf1	398.813	0.670687	0.182656	3.67186	0.000240792	0.0282195
transcript:ENSMUST00000152247	Tnrc18	1131.39	0.671251	0.186014	3.60859	0.000307862	0.0336744
transcript:ENSMUST00000063694	Klf13	2209.65	0.672647	0.137495	4.89217	9.97284e-07	0.000266541
transcript:ENSMUST00000208199	Samd4b	475.301	0.673604	0.182783	3.68527	0.000228462	0.0272613
transcript:ENSMUST00000068044	Slc39a14	265.16	0.67661	0.182888	3.6996	0.000215942	0.0260835
transcript:ENSMUST00000054979	Aff1	266.898	0.685745	0.174706	3.92513	8.66834e-05	0.0123375
transcript:ENSMUST00000036376	Tmub2	154.259	0.69031	0.19371	3.56362	0.000365774	0.0381711
transcript:ENSMUST00000035208	Bsn	6811.75	0.693264	0.208576	3.32379	0.000888027	0.0723479
transcript:ENSMUST00000114002	Itsn1	1065.44	0.700182	0.22586	3.10008	0.00193472	0.125303
transcript:ENSMUST00000105680	Rere	837.5	0.714747	0.202013	3.53812	0.000402989	0.0410395
transcript:ENSMUST00000042603	Inhba	143.41	0.717358	0.242071	2.96342	0.00304245	0.166965
transcript:ENSMUST00000097644	Hdac4	680.778	0.719465	0.162945	4.41539	1.00829e-05	0.00200939
transcript:ENSMUST00000192833	Gm26917	174417	0.719636	0.189906	3.78943	0.000150996	0.0193464
transcript:ENSMUST00000198417	Gm42829	64.2335	0.719816	0.247986	2.90265	0.0037002	0.18728
transcript:ENSMUST00000099494	Btaf1	1000.04	0.722457	0.134715	5.36286	8.19127e-08	3.24715e-05
transcript:ENSMUST00000095176	Znrf1	74.2403	0.731943	0.240132	3.04809	0.00230304	0.140337
transcript:ENSMUST00000069098	Soga1	524.019	0.738583	0.207611	3.55754	0.000374343	0.0387231
transcript:ENSMUST00000026670	Nptx1	3868.92	0.742603	0.220745	3.36408	0.000767999	0.0652699
transcript:ENSMUST00000021209	Doc2b	738.396	0.744622	0.156784	4.74936	2.04058e-06	0.000504147
transcript:ENSMUST00000189441	9230112E08Rik	67.4183	0.745144	0.258107	2.88696	0.00388981	0.19356
transcript:ENSMUST00000198899	Nrxn1	147.518	0.759176	0.230721	3.29045	0.00100026	0.0787803
transcript:ENSMUST00000210665	Gm45640	93.5144	0.762339	0.235611	3.23559	0.00121394	0.0906477
transcript:ENSMUST00000161949	Pag1	321.279	0.765776	0.1831	4.18228	2.88599e-05	0.00502843
transcript:ENSMUST00000225197	Zswim6	194.093	0.770048	0.265914	2.89585	0.00378133	0.190083
transcript:ENSMUST00000171691	Mdga1	541.014	0.776329	0.185017	4.19598	2.71694e-05	0.00477615
transcript:ENSMUST00000200409	Ap1ar	300.89	0.781965	0.211692	3.69389	0.000220852	0.0266221
transcript:ENSMUST00000160424	Cacna1i	751.826	0.796375	0.181068	4.39822	1.09143e-05	0.00214889
transcript:ENSMUST00000216150	Zbtb16	231.011	0.805271	0.169581	4.74858	2.04848e-06	0.000504147
transcript:ENSMUST00000040514	Irs2	999.692	0.818821	0.242349	3.37868	0.000728337	0.0632638
transcript:ENSMUST00000094214	9230112E08Rik	64.8255	0.825119	0.276802	2.98089	0.00287409	0.161216
transcript:ENSMUST00000114155	Nrp2	412.532	0.826719	0.234321	3.52815	0.000418474	0.0420367
transcript:ENSMUST00000043893	Tbc1d1	262.952	0.835059	0.281533	2.96611	0.00301588	0.166327
transcript:ENSMUST00000090554	Trp53i11	273.495	0.837324	0.27132	3.08611	0.00202794	0.128798
transcript:ENSMUST00000098924	Adar	897.522	0.852519	0.287552	2.96475	0.00302931	0.166636
transcript:ENSMUST00000093852	Zbtb16	769.106	0.861772	0.253559	3.39871	0.000677044	0.0601358
transcript:ENSMUST00000032174	Klf15	92.7045	0.888398	0.276082	3.21788	0.00129143	0.0943177
transcript:ENSMUST00000182356	Anks1b	559.272	0.913727	0.191275	4.77702	1.7791e-06	0.000449078
transcript:ENSMUST00000049583	Zbtb40	110.124	0.918494	0.256392	3.58238	0.000340473	0.036235
transcript:ENSMUST00000033741	Bgn	84.3291	0.920923	0.308538	2.9848	0.00283764	0.160084
transcript:ENSMUST00000100812	Git1	676.32	0.926688	0.312281	2.96749	0.00300245	0.165993
transcript:ENSMUST00000170102	Luzp1	484.572	0.927959	0.212164	4.37377	1.22117e-05	0.00237268
transcript:ENSMUST00000131070	Ide	830.639	0.929749	0.206792	4.49606	6.9224e-06	0.00146028
transcript:ENSMUST00000212381	Agap3	184.192	0.941636	0.302795	3.10982	0.00187204	0.12286
transcript:ENSMUST00000097992	Focad	470.363	0.965162	0.155173	6.21989	4.97498e-10	3.09318e-07
transcript:ENSMUST00000197124	Gabra2	84.6593	0.972967	0.31618	3.07725	0.00208917	0.131415
transcript:ENSMUST00000229552	Cyhr1	108.784	0.973581	0.240205	4.05312	5.0539e-05	0.00785562
transcript:ENSMUST00000183880	Erc1	179.65	0.996092	0.340801	2.9228	0.00346902	0.180398
transcript:ENSMUST00000031017	Fosl2	617.113	0.997026	0.289444	3.44462	0.00057186	0.0530258
transcript:ENSMUST00000030407	Mycl	164.853	1.01663	0.348886	2.91392	0.00356918	0.183319
transcript:ENSMUST00000090826	Rapgef4	471.814	1.02196	0.293585	3.48096	0.000499619	0.047829
transcript:ENSMUST00000097043	Taf1a	34.4192	1.03175	0.3553	2.90389	0.00368562	0.186863
transcript:ENSMUST00000072767	Arhgef12	45.5912	1.03563	0.317787	3.25888	0.00111852	0.0850117
transcript:ENSMUST00000111265	Tspan18	158.588	1.03881	0.232996	4.45849	8.25383e-06	0.00170462
transcript:ENSMUST00000087399	Tnxb	133.223	1.06134	0.206587	5.13751	2.78399e-07	9.29035e-05
transcript:ENSMUST00000041544	Fbln2	36.644	1.0667	0.348437	3.06138	0.00220319	0.135876
transcript:ENSMUST00000109307	Mat2b	44.7877	1.07695	0.347636	3.09793	0.00194879	0.126076
transcript:ENSMUST00000203288	Itpr1	48.1396	1.07778	0.36313	2.96802	0.0029972	0.165987
transcript:ENSMUST00000166820	R3hdm2	310.011	1.07787	0.322686	3.3403	0.000836874	0.0692308
transcript:ENSMUST00000125153	Epb41l1	160.79	1.10885	0.344443	3.21925	0.00128526	0.0942767
transcript:ENSMUST00000037286	C1ql2	328.568	1.11347	0.269862	4.12605	3.6904e-05	0.00609357
transcript:ENSMUST00000128375	Nfrkb	121.68	1.14791	0.31996	3.58768	0.000333631	0.0357053
transcript:ENSMUST00000226782	Spcs1	91.4564	1.14866	0.325569	3.52817	0.000418448	0.0420367
transcript:ENSMUST00000046948	Cables1	101.507	1.15967	0.261372	4.43686	9.12816e-06	0.00184848
transcript:ENSMUST00000131792	Cdkal1	34.4273	1.16801	0.399854	2.92109	0.00348807	0.180566
transcript:ENSMUST00000191759	Gm37530	43.9225	1.17733	0.309112	3.80877	0.000139662	0.0182985
transcript:ENSMUST00000005810	Mthfd2	40.9777	1.179	0.382944	3.07877	0.00207858	0.131028
transcript:ENSMUST00000228102	Enox1	64.9757	1.19449	0.332284	3.5948	0.000324639	0.035055
transcript:ENSMUST00000159948	Lmo7	26.8182	1.20318	0.39331	3.05911	0.00221993	0.136586
transcript:ENSMUST00000071591	Auts2	109.25	1.20659	0.35632	3.38625	0.000708558	0.0623721
transcript:ENSMUST00000212746	Nrp1	97.7896	1.21386	0.302952	4.00679	6.15484e-05	0.00929035
transcript:ENSMUST00000223111	Srp54a	41.407	1.23707	0.346312	3.57213	0.000354094	0.0372815
transcript:ENSMUST00000068045	Actn4	209.912	1.23723	0.242868	5.09425	3.50123e-07	0.000111185
transcript:ENSMUST00000060655	Nod1	24.8194	1.24583	0.412545	3.01987	0.00252886	0.149591
transcript:ENSMUST00000196878	Ube2d3	319.292	1.25035	0.41702	2.9983	0.00271486	0.155647
transcript:ENSMUST00000105290	Nr2c1	72.2636	1.29327	0.391002	3.30759	0.000941039	0.075521
transcript:ENSMUST00000149911	Myef2	164.58	1.31937	0.25887	5.09666	3.45707e-07	0.000110976
transcript:ENSMUST00000084677	Gm21093	30.3037	1.32975	0.36734	3.61995	0.000294657	0.0325921
transcript:ENSMUST00000212100	Iqsec1	357.543	1.34261	0.394276	3.40524	0.000661056	0.0588928
transcript:ENSMUST00000198195	Gm19439	55.6511	1.34331	0.431303	3.11455	0.00184228	0.121447
transcript:ENSMUST00000206246	Apba2	371.788	1.35019	0.435313	3.10165	0.00192445	0.124774
transcript:ENSMUST00000125122	Zzef1	55.9403	1.36027	0.443925	3.0642	0.00218256	0.135357
transcript:ENSMUST00000098119	Gm3883	50.1629	1.36405	0.337197	4.04527	5.22631e-05	0.00805998
transcript:ENSMUST00000110089	Mkks	118.788	1.37432	0.411559	3.33929	0.000839914	0.0692882
transcript:ENSMUST00000154278	Sh3bp5l	20.8156	1.39676	0.434995	3.21098	0.00132284	0.0962253
transcript:ENSMUST00000137480	Baz2b	28.5672	1.40647	0.366257	3.84012	0.000122972	0.0165079
transcript:ENSMUST00000030775	Chd5	453.834	1.41198	0.433223	3.25925	0.00111706	0.0850117
transcript:ENSMUST00000042701	Mxd4	404.639	1.41201	0.188512	7.49026	6.87375e-14	9.22739e-11
transcript:ENSMUST00000144447	Sfi1	43.811	1.41243	0.486199	2.90504	0.00367209	0.186706
transcript:ENSMUST00000067087	Alkal2	18.8909	1.42276	0.46538	3.0572	0.00223418	0.137177
transcript:ENSMUST00000220041	Stx7	452.392	1.43669	0.234133	6.13623	8.45017e-10	4.97969e-07
transcript:ENSMUST00000113201	Armcx1	15.2487	1.49737	0.513692	2.91491	0.00355786	0.1829
transcript:ENSMUST00000135414	Ssrp1	42.098	1.50002	0.352274	4.25812	2.06153e-05	0.00373134
transcript:ENSMUST00000221006	Fastkd3	27.475	1.51092	0.513177	2.94424	0.00323748	0.172856
transcript:ENSMUST00000106288	Cant1	106.932	1.52203	0.505136	3.01311	0.00258583	0.151522
transcript:ENSMUST00000180201	Fam205a2	18.3274	1.54411	0.487124	3.16984	0.00152522	0.107376
transcript:ENSMUST00000112588	Kdm5c	379.953	1.55242	0.495727	3.13161	0.00173853	0.11709
transcript:ENSMUST00000161448	Zfp316	74.9457	1.55352	0.537534	2.89008	0.00385144	0.192355
transcript:ENSMUST00000140765	Ogdh	21.5483	1.57999	0.489851	3.22546	0.00125769	0.0927424
transcript:ENSMUST00000041100	Alkbh4	19.2388	1.59149	0.492138	3.23382	0.00122145	0.090979
transcript:ENSMUST00000050574	Ccnjl	34.8538	1.59292	0.353228	4.50962	6.49443e-06	0.00138418
transcript:ENSMUST00000223551	Wdcp	63.3349	1.60148	0.285476	5.60986	2.02487e-08	8.99255e-06
transcript:ENSMUST00000174363	Skiv2l	175.365	1.62253	0.312973	5.18425	2.16889e-07	7.62547e-05
transcript:ENSMUST00000077440	Nfat5	629.494	1.63309	0.298151	5.47739	4.31647e-08	1.83422e-05
transcript:ENSMUST00000141533	Zfp664	20.8052	1.64221	0.509064	3.22595	0.00125555	0.0927071
transcript:ENSMUST00000154810	G530011O06Rik	35.3189	1.64564	0.429773	3.82909	0.000128616	0.0170715
transcript:ENSMUST00000228555	Sema5a	81.6301	1.65973	0.577788	2.87256	0.00407156	0.199082
transcript:ENSMUST00000139393	Pex26	18.2177	1.66881	0.475282	3.51121	0.000446072	0.0437669
transcript:ENSMUST00000153404	Myo5a	54.8304	1.6828	0.571246	2.94584	0.00322083	0.172633
transcript:ENSMUST00000156363	Ythdc1	46.1249	1.68543	0.421239	4.00114	6.30382e-05	0.00947434
transcript:ENSMUST00000197805	Prpf38b	62.3424	1.70767	0.419636	4.06941	4.71317e-05	0.00744353
transcript:ENSMUST00000119158	Tpm3	40.4509	1.72172	0.453653	3.79523	0.000147504	0.0190229
transcript:ENSMUST00000093942	Gpr179	10.3156	1.78817	0.609903	2.9319	0.00336896	0.177196
transcript:ENSMUST00000108492	Hif3a	59.4668	1.79367	0.400043	4.4837	7.33589e-06	0.001542
transcript:ENSMUST00000233611	Spast	90.9115	1.8004	0.577842	3.11572	0.00183495	0.12137
transcript:ENSMUST00000134959	Cdc42bpa	28.2329	1.87739	0.631034	2.9751	0.00292896	0.163503
transcript:ENSMUST00000121759	Synj1	1402.52	1.90928	0.376435	5.07201	3.93645e-07	0.000123021
transcript:ENSMUST00000125662	6330418K02Rik	8.76357	1.91572	0.665012	2.88073	0.0039675	0.195466
transcript:ENSMUST00000143980	Wipi2	8.75668	1.91897	0.654305	2.93284	0.00335872	0.176815
transcript:ENSMUST00000207622	Ppme1	41.6306	1.93442	0.593284	3.26054	0.00111202	0.0849711
transcript:ENSMUST00000031976	Prdm5	70.7719	1.93771	0.422767	4.58338	4.57511e-06	0.0010275
transcript:ENSMUST00000027528	Mlph	19.162	1.94274	0.631158	3.07805	0.00208358	0.131204
transcript:ENSMUST00000152357	Phc3	95.6425	1.9687	0.542453	3.62925	0.000284249	0.0317982
transcript:ENSMUST00000182078	Ank2	4368.08	1.99336	0.662915	3.00696	0.00263871	0.153215
transcript:ENSMUST00000214860	Clasp2	287.838	2.00929	0.236964	8.47934	2.26482e-17	6.68868e-14
transcript:ENSMUST00000063839	Rbm12b2	208.441	2.02327	0.674733	2.99862	0.00271205	0.155647
transcript:ENSMUST00000200328	Proser1	9.15434	2.03206	0.678911	2.99312	0.00276145	0.156986
transcript:ENSMUST00000210438	C030029H02Rik	14.6856	2.03799	0.576635	3.53428	0.000408889	0.0414214
transcript:ENSMUST00000192844	Pfkfb3	30.0021	2.04287	0.676094	3.02158	0.00251459	0.148973
transcript:ENSMUST00000076124	Srrm4	165.983	2.07324	0.495694	4.18249	2.88333e-05	0.00502843
transcript:ENSMUST00000209239	Trpm4	7.59771	2.08821	0.695114	3.00412	0.0026635	0.153935
transcript:ENSMUST00000192841	Cop1	11.7044	2.13359	0.585456	3.64432	0.000268105	0.0306897
transcript:ENSMUST00000159168	Umad1	83.5282	2.15379	0.688609	3.12774	0.00176155	0.117968
transcript:ENSMUST00000077983	Sdccag3	22.2318	2.15531	0.550816	3.91295	9.11769e-05	0.0128872
transcript:ENSMUST00000030191	Npr2	109.806	2.15786	0.48422	4.45636	8.33636e-06	0.00171566
transcript:ENSMUST00000051169	Edrf1	83.3879	2.21702	0.609894	3.63509	0.000277884	0.0313834
transcript:ENSMUST00000195059	Enah	280.969	2.25522	0.42637	5.28936	1.22748e-07	4.6476e-05
transcript:ENSMUST00000148064	Gm16278	8.51609	2.28624	0.699984	3.26614	0.00109026	0.0839811
transcript:ENSMUST00000038341	Bub1b	9.73587	2.30769	0.767577	3.00646	0.00264308	0.153215
transcript:ENSMUST00000220509	Ppp2r5c	71.0878	2.32297	0.790778	2.93757	0.00330795	0.174921
transcript:ENSMUST00000164189	Oplah	28.6522	2.34473	0.39983	5.86431	4.51016e-09	2.21997e-06
transcript:ENSMUST00000212181	Dock9	554.459	2.34847	0.711901	3.29887	0.000970762	0.0773013
transcript:ENSMUST00000099147	Tmem267	48.6592	2.4116	0.733697	3.28692	0.0010129	0.0793477
transcript:ENSMUST00000097453	Cdc42bpa	188.082	2.48956	0.403406	6.17135	6.77085e-10	4.08089e-07
transcript:ENSMUST00000066597	Klhl26	144.019	2.5227	0.687896	3.66727	0.000245157	0.0285642
transcript:ENSMUST00000230064	Cacnb3	71.8579	2.52423	0.839712	3.00606	0.00264656	0.153215
transcript:ENSMUST00000107088	Slco2b1	72.6852	2.53612	0.382842	6.62444	3.48555e-11	2.98374e-08
transcript:ENSMUST00000225088	Rhobtb2	14.1677	2.55058	0.800757	3.1852	0.00144652	0.103064
transcript:ENSMUST00000124131	Acp2	108.559	2.55472	0.734224	3.47949	0.000502374	0.0478689
transcript:ENSMUST00000029684	Scamp3	21.6614	2.57865	0.713342	3.61488	0.000300484	0.0329896
transcript:ENSMUST00000153343	Chka	21.4594	2.58688	0.631386	4.09715	4.18273e-05	0.00669531
transcript:ENSMUST00000030076	Ptbp3	140.857	2.59363	0.777043	3.33783	0.000844359	0.0695578
transcript:ENSMUST00000082412	mt-Tr	91.6792	2.64217	0.329967	8.00736	1.17201e-15	2.56392e-12
transcript:ENSMUST00000197307	Magi2	6.83685	2.64984	0.914657	2.89708	0.0037665	0.189661
transcript:ENSMUST00000137649	Lrrc14	15.7425	2.66199	0.724452	3.67449	0.000238328	0.0280401
transcript:ENSMUST00000228001	Dmtn	30.7109	2.67822	0.834557	3.20915	0.00133128	0.0966013
transcript:ENSMUST00000022030	Ccnh	120.438	2.68613	0.875163	3.0693	0.00214564	0.133953
transcript:ENSMUST00000131059	Abr	18.7201	2.68761	0.538655	4.98948	6.05427e-07	0.00017444
transcript:ENSMUST00000118470	Skil	396.471	2.71655	0.663887	4.09188	4.27881e-05	0.0068306
transcript:ENSMUST00000197872	Ankrd13c	133.877	2.77702	0.549035	5.05801	4.23659e-07	0.000131015
transcript:ENSMUST00000130738	Ssr4	11.1645	2.80038	0.767456	3.64892	0.000263349	0.0302626
transcript:ENSMUST00000026425	Pa2g4	24.2482	2.83188	0.912323	3.10403	0.00190902	0.124282
transcript:ENSMUST00000212008	Gnao1	149.831	2.86418	0.284592	10.0642	7.95642e-24	7.83257e-20
transcript:ENSMUST00000132408	Pisd-ps1	18.8624	2.89076	0.934338	3.09391	0.00197534	0.126881
transcript:ENSMUST00000228017	Ercc6	41.0067	2.89506	0.94486	3.06401	0.00218392	0.135357
transcript:ENSMUST00000016907	Scube1	36.4429	2.96298	0.571429	5.18521	2.15771e-07	7.62547e-05
transcript:ENSMUST00000064297	Sec24a	12.6034	2.96421	0.985338	3.00832	0.00262697	0.152828
transcript:ENSMUST00000026921	Pard3	25.1572	2.99835	0.954349	3.14178	0.00167925	0.11469
transcript:ENSMUST00000109444	Col4a3bp	277.303	3.01482	0.833322	3.61783	0.000297084	0.032738
transcript:ENSMUST00000103079	Cttn	131.26	3.01946	0.358261	8.42811	3.51286e-17	8.64545e-14
transcript:ENSMUST00000034600	Mpzl2	11.1052	3.03179	0.99036	3.0613	0.00220379	0.135876
transcript:ENSMUST00000146410	Gfpt1	6.79551	3.03818	1.0354	2.93432	0.0033428	0.176133
transcript:ENSMUST00000203925	Ttll3	13.896	3.04621	1.04041	2.92789	0.00341266	0.178382
transcript:ENSMUST00000175725	Atpaf1	11.6815	3.05355	0.981183	3.11211	0.00185754	0.12218
transcript:ENSMUST00000231267	Tbccd1	13.5408	3.05737	0.71191	4.2946	1.75005e-05	0.00324491
transcript:ENSMUST00000108872	Slc36a1	335.678	3.09816	0.475331	6.5179	7.12994e-11	5.61516e-08
transcript:ENSMUST00000225884	Arhgef28	128.213	3.11185	0.89147	3.49069	0.000481772	0.0464973
transcript:ENSMUST00000082410	mt-Tg	61.3984	3.11728	0.364897	8.54289	1.30905e-17	4.29556e-14
transcript:ENSMUST00000154908	Ppp4r1l-ps	12.0932	3.11997	1.08573	2.87363	0.0040579	0.198743
transcript:ENSMUST00000099945	Amd1	198.434	3.13374	0.938423	3.33937	0.000839699	0.0692882
transcript:ENSMUST00000197502	Supt20	24.181	3.1424	1.02558	3.06401	0.00218392	0.135357
transcript:ENSMUST00000145571	Glrx2	11.2823	3.16028	0.888581	3.55655	0.000375755	0.0387288
transcript:ENSMUST00000230603	Faim2	23.6152	3.16144	1.08849	2.90442	0.00367937	0.186706
transcript:ENSMUST00000153451	Rps19	40.3742	3.1709	0.899913	3.52356	0.000425792	0.0424112
transcript:ENSMUST00000030439	Rnf220	57.805	3.19726	0.650791	4.91287	8.9751e-07	0.000243176
transcript:ENSMUST00000151951	Fam234b	329.895	3.20097	0.253007	12.6517	1.09446e-36	1.61614e-32
transcript:ENSMUST00000135100	Cnnm3	5.70369	3.21965	1.04017	3.09532	0.001966	0.126634
transcript:ENSMUST00000152801	Glmp	5.64011	3.2255	1.11506	2.89268	0.00381967	0.191359
transcript:ENSMUST00000105294	Scyl2	17.3569	3.23543	1.09792	2.94688	0.00320994	0.172362
transcript:ENSMUST00000176315	Ago1	13.5147	3.28227	1.12997	2.90473	0.0036757	0.186706
transcript:ENSMUST00000179760	Gm21887	33.7646	3.2859	0.675174	4.86675	1.13448e-06	0.00030091
transcript:ENSMUST00000143786	Ampd3	8.19279	3.32371	0.972062	3.41924	0.000627959	0.056801
transcript:ENSMUST00000195513	Qrich1	12.4026	3.34671	1.11567	2.99973	0.00270216	0.155647
transcript:ENSMUST00000106402	Camk2d	27.9999	3.37822	0.940088	3.59352	0.000326245	0.0351643
transcript:ENSMUST00000147397	Ears2	10.8552	3.46897	0.841978	4.12003	3.78831e-05	0.00621556
transcript:ENSMUST00000173221	Setd1b	6.64175	3.47921	1.06168	3.27709	0.00104884	0.0817293
transcript:ENSMUST00000081891	Zfp128	11.5325	3.48162	1.03301	3.37036	0.000750689	0.0642784
transcript:ENSMUST00000128508	Igsf8	6.34404	3.49102	1.1865	2.94228	0.0032581	0.173168
transcript:ENSMUST00000135999	Zdhhc18	6.40619	3.50835	1.21563	2.88604	0.0039012	0.193963
transcript:ENSMUST00000168678	Sin3a	100.81	3.5314	0.847474	4.16697	3.08673e-05	0.00531547
transcript:ENSMUST00000140354	Rab23	11.6456	3.53341	0.8711	4.05626	4.98654e-05	0.00779193
transcript:ENSMUST00000110132	Shld1	16.2022	3.56185	0.690167	5.16085	2.45828e-07	8.42266e-05
transcript:ENSMUST00000112544	Gm15446	80.5874	3.59947	0.425121	8.46693	2.51953e-17	7.08659e-14
transcript:ENSMUST00000129428	Nfkb1	12.3351	3.63326	1.08924	3.33559	0.000851175	0.0699242
transcript:ENSMUST00000084748	Ankrd6	4.91149	3.63983	1.23972	2.93602	0.00332457	0.175486
transcript:ENSMUST00000146073	Mid1	9.6014	3.64864	0.890036	4.09943	4.1417e-05	0.00664765
transcript:ENSMUST00000147988	Cfap44	7.03393	3.65744	1.22029	2.9972	0.00272473	0.155647
transcript:ENSMUST00000017530	Traf4	19.9802	3.67547	0.728539	5.04498	4.53569e-07	0.000138096
transcript:ENSMUST00000205687	Cd33	7.39217	3.71825	1.12198	3.314	0.000919714	0.0744162
transcript:ENSMUST00000029416	Ccnl1	10.204	3.71919	0.873529	4.25766	2.06574e-05	0.00373134
transcript:ENSMUST00000182589	Plce1	25.5993	3.79653	1.30478	2.90971	0.00361761	0.184805
transcript:ENSMUST00000189004	Snap91	5.28267	3.80807	1.23165	3.09185	0.00198916	0.126881
transcript:ENSMUST00000147038	Stx16	11.2441	3.81426	1.28963	2.95763	0.00310011	0.169078
transcript:ENSMUST00000130221	Adal	16.3535	3.84445	1.29045	2.97915	0.00289048	0.161982
transcript:ENSMUST00000141282	Cadm2	16.5195	3.86144	1.33878	2.8843	0.00392279	0.194056
transcript:ENSMUST00000111473	Cdk2ap1	20.0036	3.91848	1.29763	3.01972	0.00253008	0.149591
transcript:ENSMUST00000144298	Csmd2	37.6794	3.91922	0.900975	4.34998	1.36149e-05	0.00261096
transcript:ENSMUST00000130864	Kif21b	183.664	3.92244	0.619632	6.33028	2.44719e-10	1.60607e-07
transcript:ENSMUST00000179116	Gm16867	5.68211	3.9374	1.35243	2.91135	0.00359867	0.184353
transcript:ENSMUST00000182988	Sec31a	8.98749	3.95116	1.36978	2.88453	0.00391999	0.194056
transcript:ENSMUST00000225260	Kdm3b	8.7939	3.95703	1.36508	2.89876	0.00374641	0.188921
transcript:ENSMUST00000027512	Atg16l1	23.6904	3.95793	1.17718	3.36222	0.000773192	0.0654288
transcript:ENSMUST00000182179	Nktr	12.0296	3.96012	1.25926	3.14478	0.0016621	0.114066
transcript:ENSMUST00000049009	Rad9b	5.79639	3.97215	1.37941	2.8796	0.00398185	0.19583
transcript:ENSMUST00000152521	Eif1	117.13	3.99782	0.461397	8.66461	4.53076e-18	1.91153e-14
transcript:ENSMUST00000213133	9530077C05Rik	11.7017	4.00518	1.10696	3.61817	0.000296691	0.032738
transcript:ENSMUST00000201452	Hsph1	33.4868	4.0088	0.843175	4.75441	1.99023e-06	0.000493929
transcript:ENSMUST00000207775	Myh14	84.8622	4.02534	1.15253	3.49262	0.000478311	0.0462388
transcript:ENSMUST00000185408	Fn1	26.8961	4.07299	1.20564	3.37828	0.000729398	0.0632638
transcript:ENSMUST00000188503	Ly6e	45.2596	4.10875	0.818173	5.02186	5.11742e-07	0.000151516
transcript:ENSMUST00000165401	Gm5859	17.1731	4.11462	0.90426	4.55027	5.35781e-06	0.00115078
transcript:ENSMUST00000151289	Sgms1	38.2024	4.14799	1.39913	2.96468	0.00302995	0.166636
transcript:ENSMUST00000212461	Golga4	17.072	4.15061	0.97578	4.25363	2.10333e-05	0.00378766
transcript:ENSMUST00000168977	Ylpm1	47.931	4.15268	1.37349	3.02344	0.00249919	0.148508
transcript:ENSMUST00000159597	Lmo7	158.721	4.19265	1.27138	3.29772	0.000974721	0.0773829
transcript:ENSMUST00000080202	Sirt7	10.2877	4.21689	1.07302	3.92992	8.49737e-05	0.0121233
transcript:ENSMUST00000176518	Pex12	31.4333	4.21863	0.638844	6.60354	4.01456e-11	3.38749e-08
transcript:ENSMUST00000141960	Tia1	25.1456	4.22069	0.675518	6.24808	4.15542e-10	2.61111e-07
transcript:ENSMUST00000205490	Rps13	7.05333	4.22097	1.16452	3.62463	0.000289371	0.032158
transcript:ENSMUST00000166294	Il1rap	19.9993	4.233	1.4098	3.00255	0.00267731	0.154583
transcript:ENSMUST00000131134	Col11a2	19.8037	4.24725	1.41159	3.00885	0.00262239	0.152828
transcript:ENSMUST00000098457	Mical3	72.9318	4.25089	1.47358	2.88474	0.00391735	0.194056
transcript:ENSMUST00000224463	Rps23	19.4409	4.26025	1.17302	3.63188	0.000281366	0.0315954
transcript:ENSMUST00000134191	Ldhb	11.1917	4.26212	1.29203	3.29878	0.000971075	0.0773013
transcript:ENSMUST00000180041	Stard9	78.3382	4.26324	1.11326	3.82952	0.000128392	0.0170715
transcript:ENSMUST00000071935	Myo9b	122.43	4.30781	1.22502	3.51653	0.000437221	0.0431133
transcript:ENSMUST00000187861	Nfasc	93.2689	4.33429	1.43064	3.02962	0.00244864	0.146388
transcript:ENSMUST00000225443	Gm5790	4.1447	4.33758	1.38223	3.13811	0.00170044	0.115334
transcript:ENSMUST00000069772	Tmem143	7.7589	4.34952	1.33151	3.26659	0.00108849	0.0839811
transcript:ENSMUST00000206789	Tubgcp5	54.9745	4.36259	0.910221	4.7929	1.6439e-06	0.000416732
transcript:ENSMUST00000207394	St5	4.25251	4.38714	1.36266	3.21954	0.00128398	0.0942767
transcript:ENSMUST00000196894	Rufy3	603.52	4.39146	0.714423	6.14686	7.90318e-10	4.71524e-07
transcript:ENSMUST00000000087	Scmh1	105.26	4.39296	1.10497	3.97565	7.01875e-05	0.0103539
transcript:ENSMUST00000129293	Camk2d	59.9181	4.41188	1.34208	3.28735	0.00101134	0.0793302
transcript:ENSMUST00000091497	Frmd4a	119.127	4.44666	1.40269	3.17009	0.00152391	0.107376
transcript:ENSMUST00000188008	Tfdp2	4.49211	4.44987	1.42844	3.1152	0.00183818	0.121447
transcript:ENSMUST00000221875	Gdi2	84.9111	4.47645	0.572241	7.82267	5.17137e-15	1.01817e-11
transcript:ENSMUST00000230352	Mapk12	4.53279	4.48355	1.37549	3.25961	0.00111564	0.0850117
transcript:ENSMUST00000164930	Map4	244.035	4.50465	1.23063	3.66044	0.000251779	0.0291599
transcript:ENSMUST00000050201	Mapk3	17.4327	4.51281	1.44068	3.13242	0.00173374	0.116901
transcript:ENSMUST00000063508	Gria4	223.966	4.55624	0.751971	6.05906	1.36921e-09	7.35217e-07
transcript:ENSMUST00000184888	Dmtf1	19.0578	4.56142	1.20512	3.78503	0.000153691	0.0196067
transcript:ENSMUST00000152881	4932438A13Rik	135.579	4.5764	1.26175	3.62703	0.000286698	0.0320115
transcript:ENSMUST00000155558	Cluh	249.76	4.57771	1.19288	3.83753	0.000124276	0.0166074
transcript:ENSMUST00000053927	Erbin	121.816	4.58072	1.519	3.01561	0.00256459	0.150604
transcript:ENSMUST00000119786	Kcnt2	55.4412	4.58692	1.41416	3.24356	0.00118048	0.0882609
transcript:ENSMUST00000181901	Gm26760	2.46997	4.62124	1.59331	2.9004	0.00372683	0.188144
transcript:ENSMUST00000107053	Mrpl48	4.9842	4.62429	1.34277	3.44384	0.000573512	0.0530957
transcript:ENSMUST00000073625	Inca1	5.04113	4.63726	1.38448	3.34945	0.000809715	0.0672667
transcript:ENSMUST00000189132	Gm17751	2.5063	4.63802	1.53745	3.0167	0.00255546	0.150339
transcript:ENSMUST00000129593	Erlec1	18.5657	4.64515	1.57136	2.95614	0.00311512	0.169583
transcript:ENSMUST00000196621	A730020M07Rik	2.52186	4.64544	1.59271	2.91669	0.00353765	0.182334
transcript:ENSMUST00000194204	Kcnj9	19.1249	4.65649	0.977964	4.76141	1.92246e-06	0.000481152
transcript:ENSMUST00000118118	Spg20	91.353	4.66444	1.31143	3.55675	0.000375467	0.0387288
transcript:ENSMUST00000164083	Ascc1	14.7668	4.69957	1.5536	3.02496	0.00248668	0.148023
transcript:ENSMUST00000113933	Pcyt1b	82.2181	4.70086	0.522866	8.99057	2.45961e-19	1.32072e-15
transcript:ENSMUST00000123523	Palld	2.61006	4.70111	1.60872	2.92227	0.00347495	0.180398
transcript:ENSMUST00000141741	Gm16933	2.61006	4.70111	1.60872	2.92227	0.00347495	0.180398
transcript:ENSMUST00000156675	Armc9	2.63597	4.71279	1.5805	2.98184	0.00286526	0.161168
transcript:ENSMUST00000038006	Acmsd	2.64127	4.71526	1.55833	3.02584	0.00247941	0.147779
transcript:ENSMUST00000144478	L1cam	19.7468	4.73478	1.32052	3.58555	0.000336365	0.0358738
transcript:ENSMUST00000114057	Pls3	41.4828	4.75335	1.5405	3.08559	0.00203152	0.128887
transcript:ENSMUST00000212625	Cenpt	2.78128	4.79041	1.52477	3.14172	0.0016796	0.11469
transcript:ENSMUST00000136837	Ppfibp1	2.79684	4.79674	1.51962	3.15653	0.00159658	0.110815
transcript:ENSMUST00000138000	Pomt1	2.81761	4.80543	1.54651	3.10728	0.0018882	0.123509
transcript:ENSMUST00000150940	Ctnnd1	2.82795	4.81016	1.59539	3.01503	0.00256957	0.150719
transcript:ENSMUST00000069709	Aasdh	29.044	4.82072	1.39183	3.46359	0.00053302	0.0498155
transcript:ENSMUST00000176500	Arhgef2	161.236	4.83734	1.31638	3.67472	0.000238113	0.0280401
transcript:ENSMUST00000146219	Col4a2	2.88513	4.84615	1.66563	2.90951	0.00362	0.184805
transcript:ENSMUST00000154651	Surf4	2.93181	4.8661	1.47886	3.29044	0.00100033	0.0787803
transcript:ENSMUST00000155045	Zfp408	2.93189	4.86612	1.58986	3.06072	0.00220807	0.135998
transcript:ENSMUST00000189629	Gm42715	467.15	4.87002	0.738345	6.59586	4.22808e-11	3.5174e-08
transcript:ENSMUST00000167363	Gm17081	2.97327	4.88262	1.56133	3.12721	0.00176476	0.118049
transcript:ENSMUST00000141151	Ctnnd1	2.97848	4.88514	1.60628	3.04127	0.00235584	0.143012
transcript:ENSMUST00000148208	Prkab1	2.99395	4.89224	1.6953	2.88576	0.00390474	0.193976
transcript:ENSMUST00000112633	Kcnj3	17.2107	4.92846	1.57288	3.13339	0.00172797	0.116778
transcript:ENSMUST00000145345	Tmem234	3.06686	4.93171	1.68393	2.9287	0.00340387	0.178369
transcript:ENSMUST00000148220	Tmc6	3.07199	4.93402	1.5502	3.18282	0.00145851	0.103793
transcript:ENSMUST00000173642	Tcerg1	26.7083	4.93436	1.51279	3.26177	0.0011072	0.0847627
transcript:ENSMUST00000052079	Pram1	3.09268	4.94171	1.48338	3.33138	0.000864174	0.0707247
transcript:ENSMUST00000209844	Il18bp	6.23996	4.9542	1.40708	3.5209	0.000430088	0.0427669
transcript:ENSMUST00000196960	Srrt	3.12379	4.95423	1.5999	3.09659	0.00195757	0.12644
transcript:ENSMUST00000100414	Vps25	6.37594	4.97946	1.72871	2.88045	0.00397113	0.195466
transcript:ENSMUST00000182267	Plce1	46.2998	4.98657	1.62377	3.07098	0.00213359	0.13364
transcript:ENSMUST00000210676	Gab1	75.9068	5.00807	1.20643	4.15114	3.30828e-05	0.00562596
transcript:ENSMUST00000138818	Tedc2	3.26911	5.02019	1.60018	3.13726	0.00170533	0.115513
transcript:ENSMUST00000115206	Nrf1	6.56261	5.02652	1.57585	3.18972	0.00142413	0.102027
transcript:ENSMUST00000230583	Cyth4	3.31585	5.04656	1.66991	3.02205	0.0025107	0.148892
transcript:ENSMUST00000228345	Taf2	3.32611	5.05061	1.63263	3.09355	0.00197778	0.126881
transcript:ENSMUST00000194134	Mme	37.8362	5.05152	1.32592	3.80983	0.000139061	0.0182936
transcript:ENSMUST00000142640	Psme3	3.33654	5.05524	1.52929	3.30562	0.000947656	0.0759488
transcript:ENSMUST00000146158	Zfp276	3.34175	5.05731	1.50483	3.36072	0.000777397	0.0656387
transcript:ENSMUST00000024810	Fgd2	3.37809	5.06991	1.45721	3.4792	0.000502918	0.0478689
transcript:ENSMUST00000132618	Eif1	108.953	5.07537	0.676427	7.50321	6.22758e-14	8.55438e-11
transcript:ENSMUST00000099261	4933416C03Rik	3.4092	5.08091	1.53047	3.31984	0.000900682	0.0730765
transcript:ENSMUST00000131327	Tcirg1	6.94584	5.11417	1.45359	3.5183	0.000434316	0.0429703
transcript:ENSMUST00000225413	Tjap1	35.8566	5.11495	1.17619	4.34876	1.36912e-05	0.0026171
transcript:ENSMUST00000160388	Irf8	3.50775	5.12572	1.45459	3.52383	0.000425353	0.0424112
transcript:ENSMUST00000212618	Rbm34	3.51801	5.12881	1.70417	3.00956	0.00261628	0.152828
transcript:ENSMUST00000146491	Xrcc3	3.55973	5.14372	1.61412	3.18671	0.00143902	0.102778
transcript:ENSMUST00000106644	Nrd1	278.266	5.15835	1.28184	4.02416	5.71787e-05	0.00870443
transcript:ENSMUST00000226214	Sybu	37.3512	5.17616	1.18209	4.37881	1.19329e-05	0.00232618
transcript:ENSMUST00000114705	Tmem25	3.6429	5.1802	1.70411	3.03982	0.00236717	0.143152
transcript:ENSMUST00000176944	Ap2b1	3.66341	5.18755	1.44211	3.59721	0.000321655	0.0348603
transcript:ENSMUST00000065143	Bcor	34.7946	5.19506	1.79228	2.89858	0.00374862	0.188921
transcript:ENSMUST00000121728	Gm13301	33.9304	5.1964	0.823675	6.3088	2.8121e-10	1.82527e-07
transcript:ENSMUST00000021168	Wscd1	21.4492	5.20572	1.74032	2.99124	0.00277848	0.157614
transcript:ENSMUST00000156641	Abhd12	28.3912	5.20994	1.77093	2.94193	0.00326172	0.173168
transcript:ENSMUST00000133037	Mthfsd	13.4298	5.21239	1.25508	4.15303	3.28097e-05	0.0056172
transcript:ENSMUST00000160075	Bud31	21.8831	5.24315	1.18843	4.41181	1.02509e-05	0.00203182
transcript:ENSMUST00000212563	Npy5r	14.7029	5.24414	1.79459	2.9222	0.00347566	0.180398
transcript:ENSMUST00000065857	Mbtps2	3.83463	5.2515	1.44563	3.63267	0.000280505	0.0315587
transcript:ENSMUST00000226563	Reep4	3.83463	5.2515	1.44563	3.63267	0.000280505	0.0315587
transcript:ENSMUST00000152591	Sdc3	3.8554	5.25801	1.47195	3.57215	0.000354064	0.0372815
transcript:ENSMUST00000141020	Card6	3.876	5.2664	1.75205	3.00585	0.00264844	0.153215
transcript:ENSMUST00000133098	Prkab1	3.91233	5.27876	1.76107	2.99747	0.00272229	0.155647
transcript:ENSMUST00000196249	Pfkfb4	8.19085	5.3562	1.82055	2.94207	0.00326026	0.173168
transcript:ENSMUST00000217647	Scaper	37.9534	5.35834	1.64475	3.25784	0.00112263	0.0850117
transcript:ENSMUST00000187952	Plscr1	4.13577	5.36098	1.57885	3.39551	0.000685018	0.0606852
transcript:ENSMUST00000148344	Phldb1	55.4425	5.3774	1.10499	4.86647	1.13607e-06	0.00030091
transcript:ENSMUST00000213640	Pts	15.8229	5.38316	1.30745	4.1173	3.83342e-05	0.00625483
transcript:ENSMUST00000047726	Slc39a2	4.2185	5.39165	1.76537	3.05412	0.00225724	0.138019
transcript:ENSMUST00000123750	Pqlc1	15.256	5.39468	1.69517	3.18238	0.0014607	0.103824
transcript:ENSMUST00000029183	Fam83d	4.24449	5.39997	1.5569	3.46841	0.000523544	0.0491632
transcript:ENSMUST00000202503	Fam193a	4.26022	5.40456	1.40336	3.85117	0.000117555	0.0159255
transcript:ENSMUST00000209780	Saal1	8.49332	5.40505	1.44038	3.75252	0.000175069	0.0217697
transcript:ENSMUST00000185779	Pcbp4	8.45543	5.40688	1.62377	3.32983	0.000868995	0.0709932
transcript:ENSMUST00000116287	Plekhb1	115.364	5.40932	1.70815	3.16678	0.00154139	0.108256
transcript:ENSMUST00000114823	Mkrn1	92.2683	5.41303	1.3897	3.89512	9.81512e-05	0.0137054
transcript:ENSMUST00000142554	Abl1	24.5465	5.43712	1.86094	2.9217	0.00348124	0.180529
transcript:ENSMUST00000156647	Adam8	4.39495	5.4468	1.86859	2.91493	0.00355765	0.1829
transcript:ENSMUST00000167569	Rab11a	4.38997	5.44906	1.40908	3.8671	0.000110136	0.0150237
transcript:ENSMUST00000137821	Nrxn2	4.40545	5.45299	1.3936	3.91288	9.12004e-05	0.0128872
transcript:ENSMUST00000200532	Sh3glb1	4.43152	5.46046	1.51737	3.59864	0.000319885	0.0347323
transcript:ENSMUST00000102629	Psrc1	8.87676	5.47123	1.50449	3.6366	0.000276258	0.0313797
transcript:ENSMUST00000206691	Tgfb1i1	4.46751	5.47174	1.76717	3.09634	0.00195929	0.12644
transcript:ENSMUST00000119405	Gm13302	4.47802	5.47355	1.53688	3.56147	0.000368784	0.0383265
transcript:ENSMUST00000208446	Fosb	4.53537	5.49585	1.51993	3.61587	0.000299342	0.0329254
transcript:ENSMUST00000160249	Rnf123	82.5001	5.4967	0.650332	8.45214	2.85999e-17	7.67856e-14
transcript:ENSMUST00000098123	Gm13304	4.54024	5.49699	1.5671	3.50776	0.000451903	0.0441922
transcript:ENSMUST00000117202	Gm10600	17.333	5.51371	1.19474	4.61497	3.93153e-06	0.000910667
transcript:ENSMUST00000135268	Gm12576	4.62846	5.5214	1.55265	3.55613	0.000376365	0.0387288
transcript:ENSMUST00000148538	Adamts17	26.6247	5.54063	1.02375	5.41212	6.22823e-08	2.57256e-05
transcript:ENSMUST00000160570	Gpatch2	16.3444	5.56791	1.90829	2.91775	0.00352566	0.182193
transcript:ENSMUST00000226527	Zfp219	4.98132	5.62764	1.76051	3.1966	0.00139058	0.100288
transcript:ENSMUST00000141038	Adgrl4	4.99182	5.63335	1.36651	4.12242	3.74915e-05	0.00616845
transcript:ENSMUST00000223065	Trim27	46.659	5.63497	1.18488	4.75574	1.97717e-06	0.000492758
transcript:ENSMUST00000110951	Cops6	27.7808	5.65381	0.912441	6.19635	5.77866e-10	3.51879e-07
transcript:ENSMUST00000162602	Pard3	44.0779	5.66765	1.10463	5.13084	2.88457e-07	9.51843e-05
transcript:ENSMUST00000133563	Hsd17b7	5.11636	5.67025	1.37401	4.12679	3.67864e-05	0.00609357
transcript:ENSMUST00000159824	Tcirg1	5.12158	5.67146	1.36639	4.1507	3.31465e-05	0.00562596
transcript:ENSMUST00000126543	Fbxo18	5.12671	5.67251	1.37803	4.1164	3.84836e-05	0.00626191
transcript:ENSMUST00000200299	Ulk1	92.4485	5.67806	1.7285	3.28496	0.00101996	0.0797944
transcript:ENSMUST00000113307	Slc25a25	65.733	5.71943	1.4665	3.90004	9.61749e-05	0.0134933
transcript:ENSMUST00000098391	Pcsk6	97.9073	5.72288	1.60045	3.5758	0.000349164	0.03696
transcript:ENSMUST00000040873	Srrt	40.1903	5.73023	1.42437	4.02299	5.74631e-05	0.00872036
transcript:ENSMUST00000218095	1810014B01Rik	5.44853	5.7589	1.38827	4.14825	3.35032e-05	0.00565399
transcript:ENSMUST00000228814	Tars	5.51605	5.77984	1.45829	3.96343	7.38797e-05	0.0107482
transcript:ENSMUST00000113883	Arhgef9	483.396	5.78162	1.90965	3.02759	0.00246516	0.147226
transcript:ENSMUST00000197015	Kcnq2	1851.04	5.8623	0.638977	9.17451	4.53638e-20	2.67946e-16
transcript:ENSMUST00000209846	Hrh2	11.6222	5.86446	1.55503	3.77129	0.000162405	0.020541
transcript:ENSMUST00000192967	Enah	5.99337	5.89851	1.35101	4.366	1.26543e-05	0.00245062
transcript:ENSMUST00000166543	Ralbp1	132.766	5.90984	1.45004	4.07565	4.58859e-05	0.00728575
transcript:ENSMUST00000043520	Fbxo25	33.3812	5.91593	0.925771	6.39027	1.6559e-10	1.16437e-07
transcript:ENSMUST00000143176	Cdc42bpa	228.645	5.91829	1.18718	4.98515	6.19123e-07	0.000175813
transcript:ENSMUST00000108343	Akt2	12.3491	5.9561	1.64334	3.62439	0.000289643	0.032158
transcript:ENSMUST00000196908	Pdlim5	6.32032	5.97357	1.36943	4.36209	1.28823e-05	0.00247853
transcript:ENSMUST00000164430	Nfkb1	23.3146	5.98354	1.21478	4.92562	8.40943e-07	0.000229959
transcript:ENSMUST00000112599	Acvr1	47.2007	5.9877	1.58507	3.77756	0.000158371	0.020092
transcript:ENSMUST00000233176	Memo1	12.903	6.02014	1.79576	3.35241	0.000801116	0.0668997
transcript:ENSMUST00000227032	Sdr39u1	13.7178	6.11273	1.69203	3.61267	0.000303059	0.0332105
transcript:ENSMUST00000179762	Ly6c1	7.0151	6.12352	1.96986	3.1086	0.00187974	0.123229
transcript:ENSMUST00000205136	Klf15	7.18151	6.15853	1.34696	4.57218	4.82679e-06	0.0010718
transcript:ENSMUST00000133579	Spag5	7.20202	6.16217	1.66499	3.70103	0.000214728	0.0260107
transcript:ENSMUST00000140840	March11	7.20263	6.1623	1.49358	4.12587	3.69332e-05	0.00609357
transcript:ENSMUST00000221470	Drd1	14.3814	6.18359	1.70599	3.62464	0.000289363	0.032158
transcript:ENSMUST00000175728	Alg9	7.38914	6.19753	1.34512	4.60741	4.07716e-06	0.000933185
transcript:ENSMUST00000110721	Capn3	7.498	6.22183	2.11974	2.93519	0.00333348	0.175799
transcript:ENSMUST00000233344	Smoc2	14.7658	6.22244	1.38294	4.49943	6.81358e-06	0.00144248
transcript:ENSMUST00000039541	Tubgcp4	27.7532	6.22546	1.43713	4.33188	1.4784e-05	0.00280783
transcript:ENSMUST00000162240	Opa1	7.89268	6.29538	1.36753	4.60349	4.15478e-06	0.000943871
transcript:ENSMUST00000037408	Scaper	57.487	6.31333	1.52905	4.12892	3.64466e-05	0.00608123
transcript:ENSMUST00000106341	Lef1	8.08421	6.3303	2.08214	3.04029	0.00236348	0.143152
transcript:ENSMUST00000208417	Gm8995	8.35917	6.3755	1.84788	3.45017	0.000560233	0.0521114
transcript:ENSMUST00000141995	Mpdz	8.36991	6.37897	1.30261	4.89708	9.72716e-07	0.000261157
transcript:ENSMUST00000183330	Sipa1l3	31.6513	6.4043	1.27275	5.03188	4.85695e-07	0.000146368
transcript:ENSMUST00000110706	Haus2	31.1078	6.40449	1.94438	3.29384	0.000988276	0.0781439
transcript:ENSMUST00000108609	Eif5a	8.69685	6.43657	1.39639	4.60943	4.03769e-06	0.000927977
transcript:ENSMUST00000113973	Kmt5b	147.178	6.43821	1.77357	3.63009	0.000283325	0.0317549
transcript:ENSMUST00000229437	Cpsf1	8.73816	6.43934	1.35759	4.74323	2.10338e-06	0.000515513
transcript:ENSMUST00000179290	Zfp691	9.02919	6.48972	1.42251	4.56218	5.06256e-06	0.00111162
transcript:ENSMUST00000198412	Dclk1	9.21084	6.51787	1.42481	4.57455	4.77236e-06	0.00106371
transcript:ENSMUST00000056820	Cyth2	118.438	6.53268	0.667316	9.78947	1.24944e-22	1.05427e-18
transcript:ENSMUST00000055245	Abraxas1	18.3737	6.53594	2.01458	3.24432	0.0011773	0.0881347
transcript:ENSMUST00000214732	Zfp651	18.6364	6.5575	2.03156	3.22781	0.00124741	0.092446
transcript:ENSMUST00000122456	Rbm18	9.49565	6.56176	1.44162	4.55165	5.32263e-06	0.0011474
transcript:ENSMUST00000128127	Hltf	53.5471	6.57993	1.92372	3.42042	0.000625245	0.0567292
transcript:ENSMUST00000162044	Phf21b	9.70368	6.59366	1.88579	3.49649	0.000471419	0.0458729
transcript:ENSMUST00000063704	Zfp982	9.79687	6.60727	1.29611	5.09777	3.43684e-07	0.000110929
transcript:ENSMUST00000109618	Cep250	9.96826	6.63158	1.3141	5.04649	4.50008e-07	0.000137721
transcript:ENSMUST00000165733	Abcc10	10.212	6.66762	1.30637	5.10393	3.32675e-07	0.000107966
transcript:ENSMUST00000089317	Magi1	55.7752	6.69114	0.946703	7.06783	1.57372e-12	1.72136e-09
transcript:ENSMUST00000132668	Nfkb1	10.4245	6.6939	1.4175	4.72232	2.33166e-06	0.000560814
transcript:ENSMUST00000055447	Tmem241	10.4768	6.70211	1.35318	4.95286	7.31288e-07	0.000204712
transcript:ENSMUST00000223103	Clmn	10.7104	6.73497	1.34596	5.00384	5.61992e-07	0.00016433
transcript:ENSMUST00000139869	Sorbs2	39.1797	6.78312	1.88662	3.59539	0.000323907	0.0350401
transcript:ENSMUST00000147165	Trit1	11.7067	6.86475	1.45958	4.70324	2.56071e-06	0.000609883
transcript:ENSMUST00000201089	Tbc1d24	11.8984	6.88637	1.27419	5.40449	6.4993e-08	2.66588e-05
transcript:ENSMUST00000093217	B3gnt9	11.9194	6.8906	1.58695	4.34203	1.41172e-05	0.00268983
transcript:ENSMUST00000110700	Cdan1	12.0496	6.90553	1.62419	4.25169	2.12164e-05	0.00380902
transcript:ENSMUST00000074510	Prdm10	23.8317	6.91772	2.04697	3.37949	0.000726211	0.0631729
transcript:ENSMUST00000048964	Ciz1	12.2308	6.92584	1.36961	5.05681	4.26325e-07	0.000131153
transcript:ENSMUST00000210643	Srek1	12.2774	6.93274	1.31052	5.29007	1.22267e-07	4.6476e-05
transcript:ENSMUST00000198834	Fbrsl1	73.656	6.95048	1.71702	4.04799	5.16588e-05	0.00798763
transcript:ENSMUST00000151648	Dennd4b	12.4483	6.95115	2.23958	3.10377	0.00191074	0.124282
transcript:ENSMUST00000150427	Ddb2	12.6145	6.97257	1.37426	5.07369	3.90176e-07	0.000122586
transcript:ENSMUST00000042146	Stx18	12.7135	6.98178	2.05717	3.39387	0.000689132	0.0608434
transcript:ENSMUST00000165935	Pphln1	69.3371	6.98818	0.956708	7.3044	2.7851e-13	3.42719e-10
transcript:ENSMUST00000035982	Wwp1	72.0064	7.01873	1.12246	6.25297	4.02709e-10	2.55768e-07
transcript:ENSMUST00000043896	Zfhx3	194.508	7.04496	1.585	4.44476	8.79893e-06	0.00180457
transcript:ENSMUST00000166139	Vash2	13.3978	7.05876	1.38561	5.09433	3.49971e-07	0.000111185
transcript:ENSMUST00000050183	Uaca	13.5648	7.07551	1.60263	4.41494	1.01037e-05	0.00200939
transcript:ENSMUST00000114572	Krba1	13.9123	7.11305	1.79716	3.95793	7.56033e-05	0.0109451
transcript:ENSMUST00000124888	Lgals8	27.565	7.12865	2.31432	3.08024	0.00206833	0.130553
transcript:ENSMUST00000152564	4932438A13Rik	79.0676	7.16339	1.89641	3.77734	0.000158515	0.020092
transcript:ENSMUST00000064200	Tmem106c	14.4613	7.16839	1.48367	4.83153	1.35489e-06	0.000350999
transcript:ENSMUST00000224030	Hnrnpk	14.9028	7.21015	1.43622	5.02023	5.16103e-07	0.000151662
transcript:ENSMUST00000113359	Frmd4b	84.6283	7.25876	0.917986	7.90727	2.63102e-15	5.55013e-12
transcript:ENSMUST00000207823	Lysmd4	15.8882	7.30361	1.45224	5.0292	4.92528e-07	0.000147673
transcript:ENSMUST00000112248	Mospd2	16.3092	7.34289	1.43363	5.12187	3.02518e-07	9.92694e-05
transcript:ENSMUST00000159715	Galnt6	32.0506	7.34702	1.9934	3.68567	0.000228104	0.0272613
transcript:ENSMUST00000146564	Gm15446	16.5372	7.36012	1.38592	5.31064	1.09242e-07	4.21791e-05
transcript:ENSMUST00000018884	Slc25a35	16.6413	7.37177	1.27283	5.79163	6.97048e-09	3.32031e-06
transcript:ENSMUST00000049055	Lysmd3	16.7142	7.37713	1.30682	5.64509	1.65096e-08	7.38755e-06
transcript:ENSMUST00000184708	Strn4	16.8235	7.38714	1.66345	4.44085	8.96062e-06	0.00183138
transcript:ENSMUST00000230214	Gm49527	16.8901	7.39307	1.33025	5.55766	2.73416e-08	1.19627e-05
transcript:ENSMUST00000231651	Pi4ka	16.9733	7.39801	1.27819	5.78786	7.12898e-09	3.36864e-06
transcript:ENSMUST00000126222	Zfp687	17.0033	7.40168	2.25138	3.28761	0.00101041	0.0793302
transcript:ENSMUST00000068755	Bhlhb9	17.8771	7.47378	2.27573	3.28412	0.00102301	0.0799274
transcript:ENSMUST00000225977	Epb41l3	17.9075	7.47642	1.27431	5.86703	4.43662e-09	2.20213e-06
transcript:ENSMUST00000005016	Rrnad1	18.3632	7.51296	1.58652	4.7355	2.18517e-06	0.000528973
transcript:ENSMUST00000102952	Thnsl1	18.5345	7.52495	1.57778	4.76933	1.84838e-06	0.000464581
transcript:ENSMUST00000177432	Psd2	126.268	7.53554	1.93945	3.88541	0.000102158	0.0141645
transcript:ENSMUST00000101454	Flna	18.7055	7.53943	1.75801	4.28862	1.79784e-05	0.00331847
transcript:ENSMUST00000111818	Cwc22	18.8297	7.54834	2.44761	3.08396	0.00204263	0.129314
transcript:ENSMUST00000127511	Wdr17	37.9735	7.59092	2.23611	3.39469	0.000687058	0.0607511
transcript:ENSMUST00000115043	Fastk	19.4585	7.59668	1.30352	5.82781	5.61592e-09	2.71893e-06
transcript:ENSMUST00000092673	Sgk1	253.145	7.66957	1.70096	4.50896	6.51476e-06	0.00138418
transcript:ENSMUST00000036462	Fam214b	20.8388	7.69512	1.27393	6.04044	1.53695e-09	8.17852e-07
transcript:ENSMUST00000156559	C2cd3	22.417	7.80142	1.31234	5.94467	2.77011e-09	1.43526e-06
transcript:ENSMUST00000042534	Ccdc85a	44.0547	7.80671	2.57478	3.03199	0.00242945	0.145535
transcript:ENSMUST00000166288	Cxxc4	23.0187	7.83976	1.27929	6.12822	8.88664e-10	5.14606e-07
transcript:ENSMUST00000109901	Papola	23.2197	7.85142	1.83246	4.28462	1.83048e-05	0.00336821
transcript:ENSMUST00000167930	Ap2a1	23.2605	7.85325	2.15202	3.64924	0.00026302	0.0302626
transcript:ENSMUST00000001125	Kctd10	23.3246	7.85781	1.24032	6.3353	2.3688e-10	1.57209e-07
transcript:ENSMUST00000144590	Nat10	23.3611	7.85975	1.24891	6.29327	3.10846e-10	1.9957e-07
transcript:ENSMUST00000089402	Porcn	23.5373	7.8718	1.41601	5.55913	2.71127e-08	1.1951e-05
transcript:ENSMUST00000103071	Gh	23.784	7.88598	2.27882	3.46055	0.000539078	0.0503021
transcript:ENSMUST00000092849	Lig3	24.6782	7.9382	1.53835	5.16019	2.46694e-07	8.42266e-05
transcript:ENSMUST00000154325	Sec24a	25.8205	8.00444	1.23852	6.46289	1.02719e-10	7.68002e-08
transcript:ENSMUST00000115657	Pcdha11	26.3903	8.03627	1.93967	4.14311	3.4263e-05	0.00576575
transcript:ENSMUST00000170901	Ccne2	27.2061	8.07919	1.53138	5.27577	1.32201e-07	4.93969e-05
transcript:ENSMUST00000114989	Cnot4	27.5486	8.09705	1.31981	6.13502	8.51503e-10	4.97969e-07
transcript:ENSMUST00000113851	Nagk	28.6693	8.1545	1.27355	6.40299	1.52362e-10	1.09749e-07
transcript:ENSMUST00000221199	Csmd2	29.24	8.18355	1.2348	6.62741	3.41631e-11	2.96747e-08
transcript:ENSMUST00000127786	Xist	8355.03	8.19076	0.350944	23.3393	1.77171e-120	1.04648e-115
transcript:ENSMUST00000114151	Immt	274.185	8.20591	0.84028	9.76568	1.58048e-22	1.16691e-18
transcript:ENSMUST00000174050	Dnm2	31.6427	8.29726	1.24176	6.68185	2.35943e-11	2.17753e-08
transcript:ENSMUST00000147336	Trmt6	33.2618	8.37054	1.25648	6.6619	2.70302e-11	2.41904e-08
transcript:ENSMUST00000075326	Fnbp1	33.9359	8.39802	1.44827	5.79865	6.6851e-09	3.21026e-06
transcript:ENSMUST00000229385	Pmm1	34.6721	8.43	1.9867	4.24321	2.20341e-05	0.00393192
transcript:ENSMUST00000109654	Grb10	128.777	8.44004	2.72975	3.09187	0.00198898	0.126881
transcript:ENSMUST00000087956	Med12	73.5374	8.54846	2.64427	3.23282	0.00122575	0.0911841
transcript:ENSMUST00000114294	Abcg2	38.4563	8.57909	1.24636	6.88332	5.84752e-12	5.85407e-09
transcript:ENSMUST00000128326	Phldb1	40.0799	8.63922	1.2375	6.98117	2.92723e-12	3.08749e-09
transcript:ENSMUST00000137266	Inpp4a	40.7846	8.66327	1.45965	5.93519	2.93509e-09	1.50751e-06
transcript:ENSMUST00000152540	Adrm1	41.3469	8.68375	1.27976	6.78544	1.15734e-11	1.12064e-08
transcript:ENSMUST00000153883	Xist	43.5671	8.75869	1.2333	7.10183	1.2312e-12	1.37211e-09
transcript:ENSMUST00000124223	D430042O09Rik	44.8354	8.80041	2.26579	3.88404	0.000102735	0.0142112
transcript:ENSMUST00000023812	Map3k12	49.7425	8.95038	1.24107	7.21182	5.52074e-13	6.39388e-10
transcript:ENSMUST00000057000	Zc3h14	56.9872	9.14642	3.17533	2.88047	0.00397086	0.195466
transcript:ENSMUST00000218022	Smc6	65.3669	9.34438	3.22808	2.89471	0.00379503	0.190459
transcript:ENSMUST00000136471	Gpbp1	65.9422	9.35676	1.22864	7.61554	2.62595e-14	4.08169e-11
transcript:ENSMUST00000068168	Kansl1l	67.0534	9.38106	3.20126	2.93043	0.00338495	0.177721
transcript:ENSMUST00000039021	Ssx2ip	68.9109	9.42052	3.19962	2.94426	0.00323729	0.172856
transcript:ENSMUST00000142957	Pisd	69.6273	9.43595	1.29736	7.2732	3.5108e-13	4.14738e-10
transcript:ENSMUST00000084436	Cend1	254.987	9.45301	2.42371	3.90023	9.6101e-05	0.0134933
transcript:ENSMUST00000164113	Megf11	70.8615	9.46133	1.25001	7.56902	3.76048e-14	5.41748e-11
transcript:ENSMUST00000023222	Oplah	73.6682	9.51725	1.23682	7.69494	1.41559e-14	2.49385e-11
transcript:ENSMUST00000198584	Synpo2	75.0106	9.54318	1.68456	5.66508	1.46954e-08	6.62595e-06
transcript:ENSMUST00000020321	Plek	75.3231	9.54884	3.24296	2.94448	0.00323496	0.172856
transcript:ENSMUST00000115634	Diaph1	282.043	9.61673	1.10306	8.71821	2.82642e-18	1.28419e-14
transcript:ENSMUST00000076022	Exosc10	84.5543	9.7157	3.21208	3.02473	0.00248852	0.148023
transcript:ENSMUST00000004055	Dzip1	87.9162	9.77195	3.3168	2.9462	0.00321705	0.172587
transcript:ENSMUST00000120691	Rab11fip3	308.519	9.77684	2.1133	4.62635	3.72174e-06	0.000868886
transcript:ENSMUST00000169324	Pogk	93.5248	9.86109	3.26677	3.01861	0.0025394	0.149843
transcript:ENSMUST00000103182	Rassf2	94.0189	9.86873	3.23791	3.04787	0.00230466	0.140337
transcript:ENSMUST00000040474	Tbc1d24	94.3187	9.87358	1.61958	6.09639	1.08492e-09	5.98898e-07
transcript:ENSMUST00000040700	Dock9	96.167	9.90132	3.24018	3.05579	0.00224467	0.137535
transcript:ENSMUST00000091087	Dnm2	96.6904	9.9093	1.2835	7.72056	1.15818e-14	2.20675e-11
transcript:ENSMUST00000188997	Erbin	99.3266	9.94796	3.24317	3.06735	0.00215963	0.134558
transcript:ENSMUST00000055013	Zmym1	100.591	9.96616	1.33171	7.48374	7.2238e-14	9.4818e-11
transcript:ENSMUST00000172362	Ppp6r3	103.443	10.0066	3.29072	3.04084	0.00235916	0.143066
transcript:ENSMUST00000113713	Tia1	110.818	10.1059	3.26407	3.0961	0.00196084	0.12644
transcript:ENSMUST00000225785	Ptprs	111.951	10.1206	3.25983	3.10464	0.00190513	0.124257
transcript:ENSMUST00000173860	Rab11b	112.387	10.1263	2.32117	4.36257	1.28543e-05	0.00247853
transcript:ENSMUST00000148351	Ipo4	113.467	10.14	3.26804	3.10276	0.00191723	0.124443
transcript:ENSMUST00000045621	Baz2a	121.922	10.2436	3.27846	3.12453	0.0017809	0.118725
transcript:ENSMUST00000127906	Dsp	122.254	10.2475	1.25709	8.1518	3.58538e-16	8.14516e-13
transcript:ENSMUST00000142817	Kalrn	124.979	10.2794	3.27298	3.14068	0.00168557	0.1147
transcript:ENSMUST00000078226	Pex5l	126.645	10.2985	3.26535	3.15388	0.00161117	0.111697
transcript:ENSMUST00000115717	Pde10a	130.786	10.3449	3.26804	3.16549	0.00154823	0.108479
transcript:ENSMUST00000046950	Phf8	134.603	10.3866	1.21989	8.51438	1.67484e-17	5.20662e-14
transcript:ENSMUST00000168776	Sept2	138.288	10.4254	3.28561	3.17304	0.0015085	0.10658
transcript:ENSMUST00000230964	Kifc2	142.194	10.4657	1.61524	6.47937	9.21087e-11	6.97499e-08
transcript:ENSMUST00000108049	Fam219a	152.794	10.5693	3.31821	3.18524	0.00144635	0.103064
transcript:ENSMUST00000056053	Setd1b	156.371	10.6027	3.30865	3.20452	0.00135286	0.0979266
transcript:ENSMUST00000114447	Cacna1b	160.003	10.6358	3.30495	3.21814	0.00129025	0.0943177
transcript:ENSMUST00000041342	Cacna1b	162.696	10.6599	3.30694	3.22348	0.00126641	0.093269
transcript:ENSMUST00000135298	Myo9a	178.231	10.7914	3.32125	3.24921	0.00115724	0.0868534
transcript:ENSMUST00000044638	Stx16	197.183	10.9372	3.32278	3.29159	0.00099623	0.0786675
transcript:ENSMUST00000141740	4932438A13Rik	227.093	11.1412	1.66997	6.67146	2.53266e-11	2.30144e-08
transcript:ENSMUST00000094700	Fryl	245.503	11.2534	3.35122	3.35802	0.000785039	0.0660428
transcript:ENSMUST00000154276	Synj1	249.414	11.2762	3.41263	3.30426	0.000952263	0.0762049
transcript:ENSMUST00000061350	Atp13a3	274.963	11.417	1.21603	9.38875	6.07144e-21	3.98462e-17
transcript:ENSMUST00000137868	Speg	275.985	11.4223	3.376	3.38337	0.000716021	0.0627485
transcript:ENSMUST00000140478	Gad1	280.643	11.4466	1.33392	8.58123	9.38669e-18	3.46521e-14
transcript:ENSMUST00000166972	Ap2a1	379.035	11.88	3.42959	3.46397	0.00053227	0.0498155
transcript:ENSMUST00000078272	Cacna2d1	521.222	12.3396	3.4532	3.57337	0.000352419	0.0372379
transcript:ENSMUST00000030768	Kcnab2	404.886	24.6612	3.66568	6.7276	1.72487e-11	1.63174e-08

[truncated: 3 more sheets: Suppl.Table 3, Suppl.Table 2, Suppl.Table 1]
